1 **In Vitro Expansion of Keratinocytes on Human Dermal Fibroblast-Derived Matrix**  
2 **Retains Their Stem-Like Characteristics**

3

4 **Chee-Wai Wong**<sup>1,2</sup>, Beverley F. Kinnear<sup>1,2</sup>, Radoslaw M. Sobota<sup>3,4</sup>, Rajkumar Ramalingam<sup>4</sup>,  
5 Catherine F. LeGrand<sup>1,2</sup>, Danielle E. Dye<sup>1,2</sup>, Michael Raghunath<sup>5</sup>, E. Birgitte Lane<sup>4</sup>, and  
6 Deirdre R. Coombe<sup>1,2,6</sup>

7

8 <sup>1</sup>School of Pharmacy and Biomedical Sciences, Faculty of Health Sciences, Curtin University,  
9 Bentley, WA 6102, Australia;

10 <sup>2</sup>Curtin Health Innovation Research Institute, Faculty of Health Science, Curtin University,  
11 Bentley, WA 6102, Australia;

12 <sup>3</sup>Institute of Molecular and Cell Biology, Agency for Science, Technology and Research  
13 (A\*STAR), 61 Biopolis Drive, No. 07-48A Proteos, Singapore 138673, Singapore;

14 <sup>4</sup>Institute of Medical Biology, Agency for Science, Technology and Research (A\*STAR), 8A  
15 Biomedical Grove, No 06-06 Immunos, Singapore 138648, Singapore;

16 <sup>5</sup>Centre for Cell Biology and Tissue Engineering, Competence Centre for Tissue Engineering  
17 and Substance Testing (TEDD), Institute for Chemistry and Biotechnology, ZHAW School  
18 of Life Science and Facility Management, Zurich University of Applied Science, Switzerland

19 <sup>6</sup>Centre for Cell Therapy and Regenerative Medicine, School of Biomedical Sciences, The  
20 University of Western Australia, Crawley, WA

21

22 \* Corresponding Author

23 Deirdre R Coombe

24 Email: D.Coombe@exchange.curtin.edu.au

25 Keywords: Extracellular matrix, keratinocytes, adult stem cells, serum-free culture,  
26 xenogeneic-free culture, self-renewal

27

28 Running Title: Dermal ECM Regulates Keratinocyte Behaviour

29

30 **Summary:**

31 The long-term expansion of keratinocytes under serum- and feeder free conditions  
32 generally results in diminished proliferation and an increased commitment to terminal  
33 differentiation. Here we present a serum and xenogeneic feeder free culture system that  
34 retains the self-renewal capacity of primary human keratinocytes. *In vivo*, the tissue  
35 microenvironment is a major contributor to determining cell fate and a key component  
36 of the microenvironment is the extracellular matrix (ECM). Accordingly, acellular  
37 ECMs derived from human dermal fibroblasts, cultured under macromolecular  
38 crowding conditions to facilitate matrix deposition and organisation, were used as the  
39 basis for a xenogeneic-free keratinocyte expansion protocol. A phospholipase A<sub>2</sub>  
40 decellularisation procedure produced matrices which, by proteomics analysis,  
41 resembled in composition the core matrix proteins of skin dermis. On these ECMs  
42 keratinocytes proliferated rapidly, retained their small size, expressed p63, did not  
43 express keratin 10 and rarely expressed keratin 16. Moreover, the colony forming  
44 efficiency of keratinocytes cultured on these acellular matrices was markedly enhanced.  
45 Collectively these data indicate that the dermal fibroblast-derived matrices support the  
46 *in vitro* expansion of keratinocytes that maintained stem-like characteristics under  
47 serum free conditions.

48

49

## 50 **Introduction**

51 The skin is an indispensable barrier that safeguards the body from the external  
52 environment. It possesses the ability to self-renew, which enables the replacement of  
53 dead cells and the repair of wounds thereby sustaining a barrier function[1]. In normal  
54 circumstances, most cutaneous wounds heal without medical intervention. However, if  
55 the wound is extensive and extends into the dermis, medical attention may be  
56 required[2]. Traditionally, the therapeutic strategy for treating large, deep wounds has  
57 been to use split-thickness skin autografts. However, this treatment is not viable in the  
58 case of extensive burn injury, as patients may lack sufficient healthy donor sites[3].

59

60 The grafting of cultured keratinocytes is an alternative treatment to assist in the repair  
61 of damaged skin. This method uses a technique originally developed by Rheinwald and  
62 Green[4] to expand keratinocytes *in vitro* from a patient's skin biopsy. In this method,  
63 expansion of keratinocytes is achieved using an irradiated mouse fibroblast feeder layer  
64 and medium containing foetal bovine serum (FBS). While this is effective for rapidly  
65 expanding keratinocytes, the reliance on xenogeneic components carries a potential risk  
66 of exposing patients to animal pathogens and immunogenic molecules[5]. To address  
67 these concerns, *in vitro* culture systems that omit both the feeder layer and serum were  
68 developed. A popular system uses a defined serum-free medium that contains the  
69 necessary growth factors and a collagen matrix to support keratinocyte attachment and  
70 growth[6, 7].

71

72 While this defined culture system may meet regulatory approval, its ability to propagate  
73 keratinocytes is inferior to the Rheinwald and Green[4] system. Keratinocytes grown  
74 in the defined serum-free system have a more limited lifespan; a diminished self-

75 renewal capacity and an increased commitment towards differentiation or  
76 senescence[7, 8]. This suggests that the defined serum-free system does not fully meet  
77 keratinocyte requirements. It is likely crucial elements required to sustain  
78 undifferentiated keratinocytes long term, reside in the fibroblast feeders used in the  
79 Rheindwald and Green system. Fibroblasts secrete cytokines, growth factors and  
80 extracellular matrix (ECM). The focus for defined culture systems has been on the  
81 cytokines and growth factors[9, 10], but it is possible the ECM is a crucial requirement  
82 that has been overlooked.

83

84 The ECM is complex meshwork of macromolecules, comprising fibrous structural  
85 proteins (e.g. collagen, fibronectin, laminin and elastin), specialised proteins (e.g.  
86 growth factors) and proteoglycans (e.g. perlecan). It was previously thought to be an  
87 inert structure that provided a platform for cell adhesion, but it is now known that the  
88 ECM provides both biochemical and biomechanical cues that regulate cell behaviours  
89 such as adhesion, migration, proliferation and differentiation[11, 12]. Currently, there  
90 is considerable interest in using cell-derived matrices to reproduce a tissue specific  
91 microenvironment. Numerous studies have shown that acellular ECM assists in  
92 maintaining the stem cell phenotype and in promoting self-renewal during *in vitro*  
93 expansion[13-16]. However, keratinocyte expansion on a dermal fibroblast derived-  
94 matrix (Fib-Mat) under serum free conditions has not been well examined.

95

96 While it is possible to generate an acellular ECM *in vitro*, most culture methods produce  
97 an unstructured ECM that lacks critical components[17, 18]. This may be due, in part  
98 to differences between the *in vitro* and *in vivo* microenvironments. Cells in culture are  
99 in a dilute solution of macromolecules of 1-10 mg/ml, which is several-fold lower than

100 the normal physiological environment that can range from 20.6 to 80 mg/ml[19]. Thus,  
101 in culture, molecular interactions in the extracellular environment may not be sufficient  
102 to produce an ECM which resembles that seen *in vivo*. To mitigate this problem, the  
103 addition of large, inert macromolecules such as Ficoll<sup>TM</sup> to the culture medium has been  
104 used to mimic the density of macromolecules within tissues. Molecules like Ficoll<sup>TM</sup>,  
105 when used in this context, have been called “macromolecular crowders” (MMC) and  
106 the process of mimicking the *in vivo* concentration of macromolecules is called  
107 “macromolecular crowding”. Interestingly, the addition of Ficoll<sup>TM</sup> to cell cultures was  
108 found to accelerate biochemical reactions and supramolecular assembly, and  
109 macromolecular crowding was found to affect the deposition and architecture of the  
110 ECM[17, 18, 20].

111

112 Here, we describe the development and functional characterization of a xenogeneic-  
113 free matrix derived from primary human dermal fibroblasts (Fig 1). A proteomics  
114 analysis confirmed that this matrix resembled, in its core protein composition, the ECM  
115 of human dermal tissue. When used as a substrate for keratinocyte growth in the  
116 absence of feeder cells and under defined serum-free conditions this Fib-Mat facilitated  
117 keratinocyte proliferation. In addition, more keratinocytes maintained the stem-like  
118 characteristics of small cell size, expression of p63 and a lack of keratin 16 expression  
119 as well as the retention of a colony forming capability. These data indicated that these  
120 acellular Fib-Mat are an appropriate microenvironment to enable the expansion of  
121 undifferentiated keratinocytes *in vitro*.

122

123

124

125

## 126 **Materials and Methods**

### 127 **Antibodies**

128 The primary rabbit polyclonal antibodies used were anti-type I collagen (Abcam;  
129 Cambridge, UK), anti-type IV collagen (Abcam), anti-fibronectin (Abcam) and the  
130 anti-perlecan antibody CCN-1 was a gift from Prof. John Whitelock (University of  
131 NSW, Sydney, Australia). The mouse monoclonal antibodies (mAbs) used were: anti-  
132 fibroblast marker (clone TE7; Millipore; MA, USA), anti-involucrin (clone SY5;  
133 Sigma; MO, USA), anti-ki67 (clone MM1; Novacastra; Wetzlar, Germany), anti-p63  
134 (clone 4A4; Abcam), anti- $\alpha$ -smooth muscle actin (clone 1A4; Sigma), anti-Thy1 (BD  
135 Bioscience; NJ, USA), and anti-vimentin (clone V9; Dako; CA, USA). The following  
136 mouse mAbs: anti-keratin 10 (K10, clone LH2), anti-keratin 14 (K14, clone LL001)  
137 and anti-keratin 16 (K16, clone LL025) were produced in house. The secondary  
138 antibodies used were Alexa488 anti-mouse IgG, Alexa546 anti-mouse IgG, Alexa 488  
139 anti-rabbit IgG and Alexa546 anti-rabbit IgG (all from Molecular Probes,  
140 ThermoFisher Scientific; OR, USA).

141

### 142 **Cell cultures**

143 Two human dermal fibroblast (HDF) donors were used, one cell population was  
144 obtained from the American Type Culture Collection (ATCC; VA, USA) and the other  
145 was from the Skin Cell Bank of Institute of Medical Biology, Singapore, and the use of  
146 these cells was covered by ethical codes overseen by Curtin University Human Ethics  
147 committee (ethics approval number: HRE-2016-0273A). HDFs were maintained in  
148 Dulbecco's Modified Eagle's medium (DMEM) supplemented with 10% FBS (Serana  
149 Europe GmbH; Pessin Germany), 10 mM HEPES, 2 mM L-glutamine and 1 mM  
150 sodium pyruvate (Gibco. ThermoFisher Scientific). Human neonatal keratinocytes

151 (purchased from Gibco) were cultured on tissue culture growth surfaces that have been  
152 coated with type I collagen (Sigma) in PBS ( $3\mu\text{g}/\text{cm}^2$ ) and maintained in Defined  
153 Keratinocyte Serum Free medium (DKSFM; Gibco). Cells were maintained in tissue  
154 culture incubators at  $37^\circ\text{C}$  and 5 % carbon dioxide. Keratinocytes at passage 4 or 5  
155 were used for all experiments.

156

### 157 **Extracellular matrix deposition with macromolecular crowding treatment**

158 HDFs were seeded at a density of  $15,000\text{ cells}/\text{cm}^2$  and were allowed to attach overnight  
159 in basal medium comprising DMEM: Ham F12 (3:1) supplemented with 2% human  
160 serum (Gibco), 10 mM HEPES, 2 mM L-glutamine, 1 mM sodium pyruvate and  
161  $30\mu\text{g}/\text{ml}$  ascorbic acid (Wako Chemical; Tokyo, Japan). The medium was then replaced  
162 with fresh medium containing 7.5 mg/ml Ficoll 70 (Sigma) and 25 mg/ml Ficoll 400  
163 (GE Lifesciences; Buckinghamshire, UK) to induce macromolecular crowding. The  
164 HDFs were cultured for 6 days for ECM deposition, with the medium changed on  
165 alternate days.

166

### 167 **Decellularization of dermal fibroblast-derived extracellular matrix**

168 The ECMs deposited using macromolecular crowding were decellularised using either  
169 EDTA (ET), ammonium hydroxide (AH) or phospholipase  $A_2$  (PLA<sub>2</sub>). For the ET  
170 method, cells were rinsed with PBS followed by 2.5 mM EDTA/PBS, and then  
171 incubated in 2.5 mM EDTA/PBS for 10 min at  $37^\circ\text{C}$ . Using a P1000 pipet, the cell  
172 monolayer was sprayed off leaving the matrix. The matrix was washed with PBS,  
173 incubated for 5 min at  $37^\circ\text{C}$  with 0.5% Triton X-100/PBS and washed with PBS. For  
174 AH decellularisation the cells were washed with PBS and incubated in 0.02 M  
175 ammonium hydroxide (Sigma)/0.5% Triton X-100/1x EDTA-Free protease inhibitor

176 (Roche; Basel, Switzerland) at 37°C for 5 min. For the PLA<sub>2</sub> method the cells were  
177 washed in PBS and incubated in PLA<sub>2</sub> (20 U/ml) (Sigma)/50 mM Tris-HCl (pH 8)/0.15  
178 M NaCl/1 mM MgCl<sub>2</sub>/1 mM CaCl<sub>2</sub>/0.5% sodium deoxycholate/1x EDTA-Free  
179 protease inhibitor (Roche) at 37°C for 30 min. Matrices decellularised by the AH and  
180 PLA<sub>2</sub> methods were then washed with PBS before being treated with 0.02 mg/ml  
181 DNase I (Amresco, PA, USA) in reaction buffer (10 mM Tris-HCl (pH 7)/2.5 mM  
182 MgCl<sub>2</sub>/0.5 mM CaCl<sub>2</sub>) at 37°C for 30 min and then washed again with PBS. The  
183 presence of DNA in decellularized ECM was determined by staining with 4',6-  
184 diamidino-2-phenylindole (DAPI; Sigma; 1µg/ml in PBS), while the presence of  
185 residual actin was determined by staining with 1 unit/ml of phalloidin conjugated with  
186 tetramethylrhodamine (TRITC). Images were captured using a Zeiss LSM510 inverted  
187 fluorescent microscope. In addition to visualizing DNA using DAPI, residual nucleic  
188 acids in the decellularized ECM were measured using the CyQUANT cell proliferation  
189 assay kit (Molecular Probes, Thermo Fisher Scientific), following the manufacturer's  
190 protocol. Fluorescence intensity was measured with 485 nm/535 nm filters using an  
191 EnSpire Multimode Plate Reader (Perkin Elmer; MA, USA).

192

### 193 **Immunocytochemistry analysis**

194 Immunofluorescent staining was performed on cells or ECM adhered to etched glass  
195 coverslips in 24-well plates. Coverslips were prepared as described in Chaturvedi *et*  
196 *al*[21]. The cell or ECM layer was fixed with 4% paraformaldehyde in PBS for 15 min  
197 at RT, washed with PBS then blocked with 10% Goat Serum/1% BSA/PBS for 1h at  
198 RT. Blocking solution was removed, and samples were incubated for 1 h at RT with  
199 primary antibody prepared in 10% Goat Serum/1% BSA/PBS. Cells were washed 3 x  
200 5 min with PBS before being incubated for 1 h with secondary antibodies prepared in



201 10% Goat Serum/1% BSA/PBS. The ECMs were washed 3 x 5 min with PBS and  
202 incubated in DAPI (1µg/ml in PBS) for 10 min. Coverslips were mounted in  
203 Vectashield antifade mounting medium (Vector Laboratories; Peterborough, UK) and  
204 sealed with nail varnish. Images were captured with either a Zeiss Axioskop  
205 Fluorescent Microscope (Carl Zeiss, Germany) using Spot Advanced software  
206 (Michigan, USA) or a Nikon A1+ Confocal Microscope (Nikon, Tokyo, Japan). All  
207 antibodies were titrated to determine their appropriate concentration for the experiment.  
208 To generate a 3D representation of the matrix, Z-stacked images of anti-Type I  
209 Collagen antibody stained ECM were obtained using a Nikon A1+ Confocal  
210 Microscope and images were merged using the NIS-Elements AR analysis software.

211

## 212 **Keratinocyte Proliferation**

213 The proliferation of keratinocytes on the substrates (Fib-Mat, type I collagen (3 µg/cm<sup>2</sup>)  
214 and tissue culture plastic (TCP) was assessed. Keratinocytes were harvested and seeded  
215 at a density of 1 x 10<sup>4</sup> cells/well in a 48-well tissue culture plate (NUNC, ThermoFisher  
216 Scientific) and grown for six days. At 24 h intervals keratinocytes were fixed for 5 min  
217 with cold acetone:methanol (1:1), washed with PBS and incubated with PBS/1%BSA  
218 for 1 h at RT before the nuclei were stained with DAPI (Sigma). Using an Olympus IX-  
219 81 high content screening inverted microscope (Olympus; Tokyo, Japan) and a 10x  
220 objective, 7 by 11 non-overlapping quadrants were imaged, to produce a 0.5 cm<sup>2</sup> area  
221 image. Nuclei/cell numbers were determined using Fiji-Image J software and its “Find  
222 Object” macro.

223

224

225

## 226 **Keratinocyte Adhesion to Substrates**

227 Cell adhesion assays were performed in 96 well tissue culture plate (NUNC).  
228 Keratinocytes were harvested, resuspended in adhesion assay buffer (DMEM (Gibco),  
229 10 mM HEPES (Gibco), 2 mM L-glutamine (Gibco), 1 mM sodium pyruvate (Gibco),  
230 0.2% BSA (Sigma), 25 µg/ml adenine (Sigma), 0.4 µg/ml hydrocortisone (SOLU-  
231 CORTEF®, Pfizer; NY, USA), 0.12 IU/ml insulin (Humulin®, Lilly; IN, USA), and  
232 seeded at a density of  $1 \times 10^4$  cells/well and left to adhere for 1 h at 37°C to either  
233 decellularized HDF ECM, type I collagen ( $3 \mu\text{g}/\text{cm}^2$ ) or TCP. Unbound cells were  
234 removed by washing with adhesion assay buffer followed by PBS. The plate was placed  
235 overnight at -80°C and brought up to RT before cell number was determined using the  
236 CyQUANT cell proliferation assay kit (Molecular Probes, Invitrogen), following  
237 manufacturer's instructions. Fluorescence intensity was measured with 485nm/535nm  
238 filter using an EnSpire Multimode Plate Reader (Perkin Elmer). Results were calculated  
239 as a percent of the control, which was prepared by pelleting  $1 \times 10^4$  keratinocytes,  
240 washing and storing the pellet at -80°C before using the CyQuant assay kit to determine  
241 the fluorescence intensity of this number of keratinocytes.

242

## 243 **Keratinocyte Size and Motility**

244 Keratinocytes were harvested and seeded ( $1 \times 10^4$  cells/well) on the various substrates  
245 in the wells of a 48-well culture plate (NUNC). After three days of culture in DKSFM  
246 keratinocytes were fixed with 4% paraformaldehyde/PBS for 15 min at RT, incubated  
247 in PBS/1%BSA for 1 h at RT before polymerized actin was stained with 1 unit/ml of  
248 Phalloidin-Alexa 488 (Molecular Probe) and nuclei with DAPI. Using an Olympus IX-  
249 81 high content screening inverted microscope (Olympus), 8 by 8 non-overlapping

250 quadrants were imaged using a 20x objective lens. Cell size as delineated by the stained  
251 actin cytoskeleton was determined using the Cell Profiler software.

252

253 Keratinocyte movement was assessed on either Fib-Mat, type I collagen coating or  
254 uncoated TCP. Keratinocytes were seeded as described and following an overnight  
255 incubation to allow cell adhesion, live images were taken using an Olympus IX-81 high  
256 content screening inverted microscope (Olympus). Time-lapse images were taken at  
257 15-min intervals over 2 days using a 10x objective.

258

### 259 **Quantification of Ki67 Positive Keratinocytes**

260 Briefly, keratinocytes were harvested and then seeded as described above and at day 3,  
261 keratinocytes were fixed with 4% paraformaldehyde for 15 min at RT, permeabilized  
262 with cold 0.1% Triton X-100/PBS for 3 min and then incubated in PBS/1% BSA for 1  
263 h at RT. The keratinocytes were blocked with 10% Goat Serum/1% BSA/PBS for 1 h  
264 at RT before being incubated with a 0.3 µg/ml anti-Ki67 antibody (Novacastra). This  
265 was followed by a 1 h incubation with Alexa 488 conjugated anti-mouse antibody at  
266 RT. Keratinocyte nuclei were stained using DAPI. Images were taken on the Olympus  
267 IX-81 high content screening inverted microscope. Using a 10x objective, 7 by 11 non-  
268 overlapping quadrants were imaged. The percent of keratinocytes positive for Ki67 was  
269 determined using the Cell Profiler software.

270

### 271 **Quantification of p63 Positive Keratinocytes**

272 Keratinocytes were seeded onto the different substrates and cultured for 3 days after  
273 which they were fixed, permeabilised and blocked as described for the Ki67 expression  
274 experiment. Keratinocytes were then incubated with 0.5µg/ml of anti-p63 mAb and the

275 anti-mouse Alexa 546 conjugated antibody, washed and the slides mounted in a DAPI-  
276 containing anti-fade mounting medium. A Nikon A1+ confocal microscope and a 10x  
277 objective lens was used to image 3 by 3 non-overlapping quadrants per slide. The  
278 percent of p63 positive keratinocytes was determined using Cell Profiler software.

279

### 280 **Colony Forming Efficiency Assay**

281 Keratinocytes were grown on acellular HDF-derived ECM, type I collagen coating or  
282 uncoated TCP for 3 days in DKSFM, before being harvested. Keratinocytes ( $1 \times 10^3$ )  
283 from each substrate were seeded into 6-well tissue culture plates containing mitomycin-  
284 treated 3T3-J2 feeder cells and cultured for 10-12 days in culture medium which was a  
285 3:1 ratio of DMEM (Gibco) and Ham's F12 (Gibco) supplemented with 10 mM  
286 HEPES (Gibco), 2 mM L-glutamine (Gibco), 1 mM sodium pyruvate (Gibco), 25  $\mu$ g/ml  
287 adenine (Sigma), 0.4  $\mu$ g/ml hydrocortisone (SOLU-CORTEF®, Pfizer), 0.12 IU/ml  
288 insulin (Humulin®), 2 nM triiodothyronine (Sigma), 10 ng/ml epidermal growth factor  
289 (BD Bioscience) and 5 mM forskolin (Sigma). Media changes were performed on  
290 alternate days. After 10-12 days the cells were fixed with (1:1) acetone: methanol and  
291 stained with 0.1% toluidine blue in ddH<sub>2</sub>O. The colonies that formed were counted,  
292 with colonies  $\geq 1 \text{ mm}^2$  being “large” and the rest “small”.

293

### 294 **Mass Spectrometry and Proteomics Analysis**

295 Dermal fibroblast-derived ECMs were generated using macromolecular crowding and  
296 decellularized using PLA<sub>2</sub>. To solubilize the acellular ECM, 8 M Urea/50 mM Tris-  
297 HCl pH 8.0 was added before scraping the matrix off the surface and transferring it to  
298 a microtube. The matrix mixture was reduced with 10 mM DTT (Sigma), alkylated  
299 with 55 mM Iodoacetamide (Sigma) and then diluted with 100 mM TEAB buffer to

300 reach a Urea concentration of < 1 M. The matrix proteins were digested with  
301 sequencing grade endoproteinase Lys-C (Promega, WI, USA) and sequencing grade-  
302 modified trypsin (Promega) at a ratio of 1:100 at 25<sup>0</sup> C for 4 h and 18 h respectively,  
303 samples were subsequently acidify with 1% TFA and desalted. Following desalting  
304 with a Sep-Pak C18 column cartridge (Waters, Milford MA), the samples were  
305 analysed using an Easy nLC 1000 liquid chromatography system (Thermo Fisher  
306 Scientific) coupled to an Orbitrap Fusion Mass Spectrometer (Thermo Fisher  
307 Scientific). Each sample was analyzed in a 60 min gradient using an Easy Spray  
308 Reverse Phase Column (50 cm x 75 µm internal diameter, C-18, 2 µm particles, Thermo  
309 Fisher Scientific). Data were acquired in -3 s cycle with the following parameters: MS  
310 in Orbitrap and MS/MS in ion trap with ion targets and resolutions (OT-MS 4 x E5  
311 ions, resolution 120 K, IT-MS/MS 1000 ions/turbo scan, “Universal Method”).

312 Data analysis: The peak list was generated using Proteome Discoverer (Version 1.4.  
313 Thermo Fisher Scientific). The MS/MS spectra were searched with the Mascot 2.5.1  
314 (Matrix Science, MA, USA) search algorithm using the Human UniProt Database. The  
315 following parameters were used: precursor mass tolerance (MS) 20 ppm, IT-MS/MS  
316 0.6 Da, 3 missed cleavages; Variable modifications: Oxidation (M), Deamidated (NQ),  
317 Acetyl N-terminal protein, Static modifications: Carboamidomethyl (C).  
318 Forward/decoy search was used for false discovery rate (FDR) estimations on  
319 peptide/PSM level, and were set at high confidence, FDR 1% and medium confidence,  
320 FDR 5%. The generated protein list was curated using the Matrisome[22] database.

321

## 322 **Statistical Analyses**

323 Statistical analyses were performed using SPSS statistics software V22.0 (IBM  
324 Corporation, NY). If the data sets were normally distributed and their variances

325 homogeneous, a parametric test was conducted; if not, a non-parametric test was used.  
326 A p-value of  $p \leq 0.05$  was considered statistically significant. For normally distributed  
327 data, experiments containing two treatments data sets were analysed with a t-test. For  
328 experiments containing 3 or more treatment data sets, one-way analysis of variance  
329 (ANOVA) was conducted followed by Tukey's posthoc test. As p63 expression data  
330 were not normally distributed, these were analysed using the Kruskal-Wallis one way  
331 analysis of variance followed by Wilcoxon's signed-ranked test.

332

### 333 **Results**

#### 334 **Development of an Acellular Dermal Fibroblast-Derived Matrix**

335 To produce a matrix that best mimics the microenvironment of keratinocytes would  
336 encounter *in vivo*, primary human dermal fibroblasts (HDFs) from adult donors were  
337 chosen as the cell source. Phase contrast microscopy revealed that the HDFs used had  
338 a uniform spindle-like morphology that is typical of fibroblasts. Immunofluorescence  
339 analyses indicated they expressed the fibroblast markers TE-7, thy-1 and vimentin  
340 (Fig. S1).

341

342 It was reported that the addition of a mixture of Ficoll 70 and Ficoll 400 to the culture  
343 medium has the effect of mimicking the space occupied by glycoproteins in plasma,  
344 and this was found to benefit ECM deposition by cells *in vitro*[17]. Accordingly, the  
345 Ficoll cocktail was included in the fibroblast culture medium to act as MMC. The  
346 Ficoll cocktail marginally altered the appearance of the HDFs, and reduced their  
347 proliferation over a 7 day period (Fig. S2A, C). However, absent immunoreactivity  
348 with an  $\alpha$ -SMA antibody indicated the HDFs had not differentiated into  
349 myofibroblasts. In contrast, when the Ficoll cocktail was omitted and the cells were

350 cultured for 7 days  $\alpha$ -SMA staining was detected, and cell morphology of the  $\alpha$ -SMA  
351 positive cells resembled that of myofibroblasts (Fig. S2B). Immunostaining of the  
352 ECM deposited when HDFs were cultured with the Ficoll MMC for 7 days revealed  
353 an increase in the staining intensity of type I collagen, type IV collagen, fibronectin  
354 and perlecan compared to cultures without MMC (Fig. 2A). When visualized with  
355 confocal microscopy, a layer of type I collagen was seen fully embedding HDFs in  
356 MMC culture, also covering the top of the cells, whereas cultures without MMC had  
357 markedly less type I collagen staining (Fig. S3A). Removal of the HDFs using a  
358 phospholipase A<sub>2</sub> (PLA<sub>2</sub>) decellularisation technique revealed that type I collagen and  
359 fibronectin were deposited uniformly across the surface when HDFs were cultured  
360 with MMC, when compared to cultures without MMC (Fig. S3B).

361

362 As macromolecular crowding enabled a well-structured and uniform deposition of  
363 ECM, without myofibroblast differentiation, MMC were used to generate the Fib-Mat.  
364 To determine a decellularisation method which removed the cells, yet preserved the  
365 ECM proteins and structure as much as possible, three decellularisation protocols were  
366 compared. These were: EDTA, ammonium hydroxide (AH) and PLA<sub>2</sub>. Phase contrast  
367 microscopy revealed all three protocols removed the fibroblasts. However, fibril-like  
368 structures were retained only with AH and PLA<sub>2</sub> treatments (Fig. S4). DAPI staining  
369 of the nucleic acids remaining after decellularisation indicated both the EDTA and the  
370 PLA<sub>2</sub> methods more effectively removed DNA than the AH method, which left distinct  
371 nuclear fragments in the ECM (Fig. S5Ai). Quantification of DNA removal indicated  
372 that the EDTA and PLA<sub>2</sub> methods were effective in removing 99% of the DNA,  
373 whereas 97% of the DNA was removed with the AH method (Fig. S5Aii). To determine  
374 whether the cytoskeletal components of the HDFs were removed following

375 decellularisation, phalloidin-TRITC staining was used to detect actin filaments. As  
376 shown in Figure S5B, a few actin filament fragments were detected following AH  
377 treatment, but no staining was apparent when EDTA or PLA<sub>2</sub> treatments were used.

378

379 To investigate the structure of the ECM following decellularisation, 3D Z-stacked  
380 confocal images were obtained following type I collagen immunostaining. Fibrillar  
381 structures of type I collagen resembling the non-decellularised control were clearly  
382 visible following AH and PLA<sub>2</sub> treatments, but the EDTA treatment disrupted the  
383 structure of the type I collagen filaments (Fig. 2B). The thickness of the ECM was  
384 measured by determining the depth of type I collagen staining was 9 µm thick. After  
385 decellularisation using the AH or PLA<sub>2</sub> protocols, ECM thickness decreased to around  
386 6 µm, which dropped further to 3 µm following EDTA treatment (Fig. 2C).  
387 Immunofluorescence intensities of the variously decellularised matrices revealed a  
388 significant reduction in type I collagen and fibronectin staining after EDTA treatment.  
389 In contrast, both AH and PLA<sub>2</sub> treatments were shown to preserve type I collagen and  
390 fibronectin immunostaining (Fig. S6).

391

### 392 **Dermal Fibroblast Matrices Mimics Skin Dermis Extracellular Matrix**

393 Collectively the data demonstrated that the PLA<sub>2</sub> decellularisation protocol produced  
394 an intact ECM that was devoid of most cell components, hence this method was used  
395 to generate acellular matrices (Fib-Mat) for further analyses. As the goal was the  
396 production of an acellular matrix that mimicked the dermal ECM, the protein  
397 compositions of the ECM derived *in vitro* from two dermal fibroblast donors were  
398 determined using mass spectrometry (MS)-based proteomics. To investigate whether  
399 the ECM produced *in vitro* by dermal fibroblasts matched dermal ECM, the ECM



400 signature of the dermis was obtained from the “Human Protein Atlas” database[23]  
401 and was compared to our proteomic data. However, after examination of the “Human  
402 Protein Atlas”, it was apparent that a number of core ECM proteins like collagen III  
403 alpha 1 (COL3A1) and laminin alpha-4 (LAMA4), which are present in the dermis,  
404 were not found in the “Human Protein Atlas” database. To ensure a comprehensive  
405 list of dermal ECM proteins was used for the comparison, the proteomic dataset of the  
406 skin prepared from studies by Bliss *et al.*[24] was used to supplement the “Human  
407 Protein Atlas” database. To curate the ECM proteins, the proteomic analyses and the  
408 “Human Protein Atlas” supplemented data were categorised using the human  
409 matrisome database (MatrisomeDB, <http://matrisomeproject.mit.edu/>). This database  
410 categories the ECM proteins into “core matrisome” (ECM glycoproteins, collagens  
411 and proteoglycans) and “matrisome-associated proteins” (ECM-affiliated proteins,  
412 ECM regulators and secreted factors)[22]. This analysis revealed that most of the core  
413 matrisome proteins expressed in the skin dermis were also found in the Fib-Mat that  
414 were prepared (Fig. 3). However, the majority of the matrisome-associated proteins  
415 were absent in these Fib-Mat (Fig. 3).

416

#### 417 **Dermal Fibroblast-Derived Matrix Supports Keratinocyte Proliferation**

418 Next, the ability of Fib-Mat to support the adhesion and proliferation of keratinocytes  
419 was investigated. Type I collagen was used as a positive control, as this is the substrate  
420 commonly used with defined keratinocyte serum free medium (DKSFM) for  
421 propagating keratinocytes[6, 7]. Tissue culture plastic (TCP) was the negative control.  
422 The extent of keratinocyte adhesion to the different substrates differed. More  
423 keratinocytes attached to Fib-Mat (84%), than to type I collagen (77%) or TCP (56%;  
424 Fig. 4A). Phase contrast microscopy revealed that keratinocytes adhered well to both

425 Fib-Mat and type I collagen but less to TCP. While keratinocytes proliferated on all  
426 three substrates, their behaviour differed. On Fib-Mat keratinocytes grew as colonies,  
427 and cells within the colonies had a small cobblestone morphology, which persisted  
428 until day 6 whereupon a near confluent monolayer was reached. Although similar  
429 behaviour was observed on TCP, the keratinocytes comprised a heterogeneous  
430 population of differing sizes. Whereas, keratinocytes on type I collagen grew as single  
431 cells, they also have a mixed population, with some of the cells being large and flat  
432 (Fig. 4B & Fig. 6A).

433

434 The rate of keratinocyte proliferation on the different substrates also differed. On Fib-  
435 Mat keratinocytes initially proliferated more slowly than keratinocytes on type I  
436 collagen but reached similar numbers by day 3. Thereafter, an exponential rate of  
437 proliferation was observed in keratinocytes on Fib-Mat, which was higher than that  
438 seen on type I collagen. On TCP, keratinocyte proliferation was slow and the rate  
439 plateaued by day 4 (Fig. 4C). Keratinocyte expression of Ki67 was determined on day  
440 3, as the growth curve (Fig. 4C) indicated a change in proliferation rates on each of  
441 the substrates at this point. More keratinocytes on Fib-Mat (84.85%) stained with the  
442 Ki67 mAb compared to that seen in keratinocytes on type I collagen (66.31%) and  
443 TCP (56.66%; Fig. 4D). Determination of the numbers of Ki67 expressing cells on  
444 day 4 and 5 revealed this remained the case (data not shown). From these data Fib-  
445 Mat was the best substrate to promote keratinocyte proliferation.

446

447

448

449 **Keratinocytes Grown on Dermal Fibroblast-Derived Matrix were**  
450 **Undifferentiated**

451 To determine differentiation status, keratinocytes grown on the different substrates  
452 were immunostained for K16, K14, K10, and involucrin. To acquire better image  
453 resolution at high magnification, etched glass coverslips (EGC) were used. To check  
454 if this growth surface affected keratinocyte behaviour, keratinocytes were grown on  
455 either TCP or EGC coated with Fib-Mat or type I collagen, or were uncoated. Cells  
456 were grown for 3 days before being fixed and immunostained for K14. Keratinocytes  
457 grown on all surfaces were similarly positive for K14 (Fig. S7). On EGC coated with  
458 type I collagen, keratinocytes grew as colonies, whereas they grew as single cells on  
459 TCP coated with type I collagen. As this was the only change, immunostaining of the  
460 differentiation markers was performed on keratinocytes grown on EGC with, or  
461 without, the various coatings. Although K14 expression was observed in keratinocytes  
462 on all substrates a population of keratinocytes on uncoated EGC did not express K14  
463 (Fig. 5A). While the expression of K10 was not observed in keratinocytes on any  
464 substrate, involucrin expression was detected in cells on all substrates. However, a  
465 higher proportion of keratinocytes were positive for involucrin when grown on  
466 uncoated EGC, as compared to keratinocytes on Fib-Mat or type I collagen. In  
467 addition, A higher proportion of keratinocytes grown on type I collagen and EGC  
468 compared to keratinocytes grown on Fib-Mat were observed to express K16 (Fig. 5A).

469

470 Keratinocytes on each of the substrates were also examined for p63 expression, a  
471 marker of “stemness”. As is shown in Figure 5B, while p63 expression was detected  
472 in keratinocytes on all substrates, the number of cells expressing p63 differed. The  
473 number of p63 expressing cells was significantly ( $p < 0.01$ ) higher on Fib-Mat

474 (93.98%) and type I collagen (95.11%) than on TCP (85.48%) and the percentage of  
475 p63 positive cells was similar on both Fib-Mat and type I collagen (Fig. 5Bii).

476

477 Keratinocytes grown on Fib-Mat appeared to be smaller than keratinocytes similarly  
478 cultured on type I collagen or TCP (Fig. 6Ai). An assay was established based on  
479 Haase *et al.*[25], where cell size was determined by the area covered by the cell.  
480 Analysis of the size of individual keratinocytes revealed a statistically significant  
481 difference ( $p \leq 0.05$ ) in the size of keratinocytes grown on Fib-Mat or type I collagen.  
482 The majority of keratinocytes residing on Fib-Mat were small cells, whilst type I  
483 collagen had the greatest number of large flat keratinocytes (Fig. 6B). While there  
484 were differences in size between cells on Fib-Mat and TCP, the differences were not  
485 statistically significant.

486

487 To evaluate the self-renewal capability of keratinocytes grown on different substrates,  
488 their colony forming ability was examined. Keratinocytes grown on either Fib-Mat,  
489 type I collagen or TCP were harvested, then seeded onto a layer of mitomycin-c treated  
490 feeder cells and grown for 12 days. The number of large colonies produced by  
491 keratinocytes grown on Fib-Mat was significantly higher ( $p < 0.01$ ) than that seen for  
492 keratinocytes from either type I collagen or TCP. Furthermore, more colonies  
493 regardless of size were observed in cultures of keratinocytes from the Fib-Mat (Fig. 7).

494

#### 495 **Keratinocytes are Highly Motile on Dermal Fibroblast-Derived Matrix**

496 Cells were seeded onto EGC or TCP either uncoated, or coated with Fib-Mat or type I  
497 collagen, and left overnight to adhere before time-lapse images were taken at 15-minute  
498 intervals over a 2 day period. Distinct keratinocyte colonies were only seen when cells

499 were on uncoated EGC or TCP. Pseudo-colonies, where keratinocytes migrated as a  
500 group of cells to form a colony, but then dispersed or combined with other colonies,  
501 were observed for cells on Fib-Mat regardless of the underlying surface. Keratinocytes  
502 on type I collagen coated EGC also formed pseudo-colonies, whereas on TCP coated  
503 with type I collagen, keratinocytes migrated as single cells. The majority of  
504 keratinocytes grown on either surface coated with Fib-Mat were highly motile over the  
505 entire 2 day period. Initially keratinocytes were similarly motile on type I collagen  
506 coated EGC or TCP, but as time progressed a proportion became less motile, and  
507 reduced motility was accompanied by an increase in cell size. Keratinocytes on  
508 uncoated EGC or TCP were the least motile, and an increase in cell size was also  
509 observed. (Links to videos are in supplementary information.)

510

511 Cell motility is linked to the organization of the actin cytoskeleton. To examine the  
512 arrangement of filamentous actin (F-actin) keratinocytes were grown on Fib-Mat, type  
513 I collagen or EGC for 3 days before being stained with phalloidin-Alexa Fluor® 488.  
514 On type I collagen and EGC, well-developed actin stress fibres were observed at the  
515 keratinocyte circumference. This was more prominent in the large keratinocytes. In  
516 contrast, stress fibres at the cell circumference were less visible in keratinocytes on  
517 Fib-Mat (Fig. 6Aii).

518

519

520

521

522

523

## 524 **Discussion**

525 The regenerative ability of keratinocyte stem cells has been known since the 1980s  
526 and has been well described in numerous studies[26-30]. However, the expansion of  
527 keratinocytes *in vitro* for clinical use has remained challenging, as it is dependent on  
528 harvesting a sufficient numbers of keratinocyte stem cells and their survival during  
529 propagation. The traditional “Rheinwald and Green method” uses murine feeder cells  
530 and FBS[4] and although this system has been used successfully it will face future  
531 hurdles as regulators embrace xenogeneic free systems as the norm for producing cells  
532 for clinical use. Keratinocytes can be expanded *in vitro* using a defined serum-free  
533 medium, and a collagen matrix to support cell attachment and growth[6, 7, 31],  
534 however, prolonged culture of keratinocytes in this way induces phenotypic changes;  
535 specifically a diminished capacity for self-renewal and an increased commitment  
536 towards terminal differentiation or senescence[7, 32, 33]. A critical factor for the  
537 long-term expansion of keratinocyte stem cells is their natural microenvironmental  
538 niche[8] and a key component of this niche that is lacking in the current defined culture  
539 system is a native ECM. In an effort to recapitulate a similar niche that the  
540 keratinocytes inhabit *in vivo*, we developed a method to generate a xenogeneic free  
541 dermal Fib-Mat (Fig. 1). This Fib-Mat substrate and defined serum-free medium better  
542 supported the proliferation of undifferentiated keratinocytes, compared to cultures of  
543 the same keratinocytes in defined serum-free medium on substrates of type I collagen  
544 or tissue TCP.

545

546 While the production and use of cell derived matrices to support the proliferation of  
547 undifferentiated stem cells has been employed previously [14, 16, 34-37], the  
548 generation of xenogeneic-free Fib-Mat using a tissue culture process that includes

549 macromolecular crowding during the deposition of the ECM, and PLA<sub>2</sub> for  
550 decellularisation, is novel. The inclusion of macromolecular crowding reagents in the  
551 primary dermal fibroblast xenogeneic-free cultures was found to reproducibly produce  
552 matrices that completely covered the surface of the culture plates. The PLA<sub>2</sub>  
553 decellularisation protocol generated the most acceptable acellular matrices in terms of  
554 absence of immunological relevant remnants, and ECM structure preservation.  
555 Proteomics analysis of Fib-Mat generated under PLA<sub>2</sub> had a core matrisome protein  
556 composition that was similar to that reported for the dermis [38, 39]. Interestingly,  
557 compared to proteomic data derived from skin dermis, the Fib-Mat lacked many of  
558 the matrisome-associated proteins. As some of the matrisome-associated proteins  
559 actually are cell-associated proteins (e.g. LGALS1, LGALS3 & GPC1) present in a  
560 full skin biopsy, it would be therefore be absent in the decellularised Fib-Mat as the  
561 cells were removed. Furthermore, as Fib-Mat is the result of a monolayer culture of  
562 fibroblasts, ECM proteins contributed by other residential cells (e.g keratinocyte &  
563 melanocyte) within the skin dermis will also be absence.

564

565 The ability of Fib-Mat to support proliferation of keratinocytes in the serum-free  
566 medium, DKSFM, was compared to similar cultures on type I collagen, the  
567 recommended substrate for use with DKSFM for keratinocyte propagation[6, 7] with  
568 TCP and no protein coating being the negative control. Keratinocytes adhered better  
569 to Fib-Mat compared to their adhesion on type I collagen or TCP. Greater keratinocyte  
570 proliferation as determined by cell number and Ki67 expression occurred on Fib-Mat,  
571 compared to keratinocytes on the other substrates. These data agree with other studies  
572 using stem cells. These other studies reported that cell-derived matrices which  
573 matched the tissue microenvironment of the cells *in vivo* better supported the

574 attachment and proliferation of mesenchymal stem cells[40-42] and synovium-derived  
575 stem cells [43, 44]. We observed an initial lag in the proliferation of keratinocytes on  
576 Fib-Mat, before an exponential increase in proliferation occurred. As Fib-Mat is a  
577 complex biological substrate compared to type I collagen, the acclimatisation of  
578 keratinocytes towards this substrate may explain the initial slow proliferation rate.

579

580 Keratins are expressed by keratinocytes in a site-specific and differentiation-  
581 dependent manner. *In vivo* K14 is expressed in keratinocytes in the basal layer of the  
582 epidermis. However, as keratinocytes differentiate and migrate towards the surface of  
583 the epidermis, K14 expression is downregulated[45, 46]. Studies assessing the *in vitro*  
584 culture of keratinocytes in which K14 has been knocked down, showed decreased K14  
585 expression was associated with reduced cell proliferation and an increase in the  
586 differentiation markers K10 and involucrin[47, 48]. In our study, K14 was expressed  
587 by keratinocytes grown on all three substrates, however there were a small proportion  
588 of keratinocytes on EGC without K14 staining (Fig. 5A). No K10 expression was  
589 observed regardless of the substrate the keratinocytes were cultured on. In contrast,  
590 involucrin was expressed by keratinocytes grown on all substrates, with a higher  
591 proportion of keratinocytes being involucrin-positive on uncoated EGC. The loss of  
592 K14 and the increased involucrin expression coincided with decreased keratinocyte  
593 proliferation on TCP/EGC. These data suggest that keratinocytes on TCP/EGC are  
594 more prone to initiating differentiation in the absence of stratification, whereas the  
595 continued K14 expression by keratinocytes residing on Fib-Mat is consistent with their  
596 preserved growth potential. However, K14 expression was not tightly associated with  
597 cell proliferation rates because there was no apparent decrease in K14 expression,  
598 despite reduced keratinocyte proliferation on type I collagen (Fig 4-5).



599

600 The pattern of K16 expression was informative, as very few keratinocytes grown on  
601 the Fib-Mat expressed this keratin whereas on the other substrates a high proportion  
602 of cells were K16 positive. K16 expression is associated with keratinocyte  
603 proliferation and migration and this keratin has been described as a marker of  
604 “stressed” or activated keratinocytes[49]. Keratin 16 is commonly expressed by  
605 keratinocytes in hyperproliferative diseases like psoriasis, squamous carcinoma and in  
606 wound healing. Indeed, within 6 h of wounding epithelial cells at the wound edge  
607 upregulate K16 expression and down regulate K10 expression[50] and these K16  
608 expressing keratinocytes are involved in re-epithelization of wound site. From our data  
609 it is clear that K16 expression can be uncoupled from proliferation. Moreover, the low  
610 level of K16 expression by keratinocytes on Fib-Mat indicates that despite their  
611 increased proliferation these cells are not mimicking a wound healing response.

612

613 A functional link between p63 expression and keratinocyte stem cell maintenance  
614 within the skin has been shown by Mills *et al.*[51] and Yang *et al.*[52] using a p63-/-  
615 mouse. Further studies by Parsa *et al.*[53] showed that p63 expression is restricted to  
616 keratinocytes with high proliferative potential that reside within the basal layer. They  
617 also found that p63 is absent from terminally differentiating keratinocytes. Our study  
618 found most keratinocytes grown on Fib-Mat or type I collagen expressed p63,  
619 whereas, fewer keratinocytes expressed p63 when cultured on TCP (Fig. 5B).  
620 Interestingly, p63 expression coincided with a decline in growth potential (Fig. 4C)  
621 and an increase in involucrin expression (Fig. 5A). This inability of TCP to support  
622 the growth of undifferentiated keratinocytes is consistent with the data of others[6].

623

624 Numerous investigator have described cell size as a criteria distinguishing  
625 keratinocyte stem cells from keratinocytes committed towards differentiation[8, 54,  
626 55]. Moreover, increased size is associated with differentiation, a characteristic that  
627 has been observed *in vivo* during normal epithelial maturation and in *in vitro* cultures  
628 [7]. Hence, the change in keratinocyte size, may indicate keratinocytes undergoing  
629 terminal differentiation, as keratinocyte enlargement accompanied by the expression  
630 of involucrin has been reported [56, 57]. Other studies also found that small  
631 keratinocytes are undifferentiated and retain a high proliferative capability[54, 55, 58].  
632 We found more small keratinocytes were present in cultures grown on Fib-Mat (85%),  
633 whereas culturing the same keratinocyte population on type I collagen produced larger  
634 cells (Fig. 6). These data were consistent with what Esteban-Vives *et al.*[7] reported.  
635  
636 Recently Nanba *et al.*[59] suggested that cell motility is an attribute of undifferentiated  
637 keratinocytes. They found keratinocyte colonies with a high rotational movement, and  
638 in which individual cells were very motile, was indicative of these colonies containing  
639 undifferentiated keratinocytes with high proliferative capability. We found  
640 keratinocytes grown on Fib-Mat to be very motile (See video in supplementary  
641 information). Distinct keratinocyte colonies formed only on TCP, whereas pseudo-  
642 colonies formed on Fib-Mat and type I collagen. Most keratinocytes grown on Fib-  
643 Mat were highly motile throughout the experiment, but keratinocytes cultured on type  
644 I collagen and TCP were less motile, a trait very evident when the time in culture was  
645 extended. Moreover, the reduced motility of individual keratinocytes was  
646 accompanied by an increase in cell size. The association of increased size, with  
647 decreased motility during keratinocyte differentiation was reported many years ago by  
648 Sun *et al.*[56] and our results are consistent with these findings.

649

650 Actin filament reorganisation is essential for changes in cell shape and motility. In our  
651 study keratinocytes plated on type I collagen or EGC without a matrix protein coating  
652 developed a circumferential actin network (Fig. 6Aii), similar to that reported by  
653 Nanba *et al.*[60] and which was described to be indicative of reduced cell movement  
654 and terminal differentiation. In contrast, keratinocytes grown on Fib-Mat had short  
655 bundles of actin that were radially distributed (Fig. 6Aii), an arrangement of actin  
656 filaments described as indicative of proliferative, undifferentiated keratinocytes[60].

657

658 Collectively, our data indicate that keratinocytes grown on Fib-Mat are less  
659 differentiated than keratinocytes cultured on TCP, which show signs of undergoing  
660 early commitment to terminal differentiation. Whereas, despite exhibiting  
661 characteristics that are indicative of differentiation (e.g. cell size, cell motility, lower  
662 colony forming ability and actin reorganization) keratinocytes grown on type I  
663 collagen still expressed markers (K14 and p63) of undifferentiated keratinocytes.  
664 Others have also found that keratinocytes retain some markers characteristic of  
665 undifferentiated cells during the early stages of differentiation. Webb *et al.*[61] found  
666 that keratinocytes in the basal layer of the epidermis do not switch off the expression  
667 of keratin 15 (a marker of keratinocyte quiescence, and in some circumstances of stem  
668 cells) even during the differentiation process. Furthermore, Esteban-Vives *et al.*[7],  
669 observed that keratinocytes grown on type I collagen still retained K15 expression  
670 despite showing signs of differentiation. Hence, it is likely that on type I collagen, the  
671 keratinocytes are in the early stages of terminal differentiation, even though some  
672 markers of undifferentiated cells are present.

673

674 This conclusion was further supported by the behaviour of the keratinocytes expanded  
675 on different substrates in a colony forming assay. Barrandon *et al.* [62] described the  
676 use of colony forming assays as an invaluable tool for determining the presence of stem  
677 cells within a keratinocyte population. Undifferentiated keratinocyte stem cells are  
678 described to have a higher self-renewal capability and form large, progressively  
679 growing colonies (> 1 mm<sup>2</sup>; holoclones). We found that keratinocytes grown on Fib-  
680 Mat produced a higher number of large colonies, when compared to keratinocytes  
681 expanded on the other two substrates. This indicate that Fib-Mat better retained and  
682 promoted the self-renewal ability of undifferentiated keratinocyte stem cells.

683

684 Others have also shown cell-ECM interactions are important for preserving the self-  
685 renewal ability of cultured keratinocytes. Adams and Watt[63] demonstrated that  
686 keratinocytes losing ECM contact are triggered to terminal differentiation. Similarly,  
687 our data and that of Coolen *et al.*[6], showed that keratinocytes undergo terminal  
688 differentiation when grown on tissue culture plastic that lacked an ECM protein.  
689 Hence, ECM proteins such as type I collagen[7], type IV collagen[6] and  
690 fibronectin[64] have been used as substrates to culture keratinocytes. Although using  
691 these single ECM proteins enable the keratinocytes to adhere and proliferate, they do  
692 not sustain the long-term growth of keratinocytes[7, 32]. In this reductionist approach,  
693 the synergistic impact of growth factors and ECM proteins and their coordinated  
694 signalling pathways in the keratinocytes is overlooked. Others have shown that even  
695 the combination of three matrix proteins can have a synergistic effect[65-67]. Flaim  
696 *et al.*[65] found that the combination of type I collagen with laminin and type III  
697 collagen enabled embryonic stem (ES) cells to efficiently differentiate towards a liver  
698 progenitor lineage, although individually these matrix proteins were unable to

699 promote liver progenitor cell differentiation. Furthermore, Watt *et al.*[64] showed that  
700 substrates comprising a combination of laminin, type IV collagen and fibronectin  
701 inhibited the differentiation of keratinocytes during *in vitro* culture.

702

703 The proteomics data indicated that our Fib-Mat contained laminins, type IV collagen  
704 and fibronectin plus numerous other ECM proteins, and some, but not all, the ECM  
705 associated proteins, but very few of the secreted factors found in the dermis. Our data  
706 indicate the combined signals of the core matrisome proteins that are present in Fib-  
707 Mat, are sufficient to suppress keratinocyte differentiation and to promote  
708 proliferation. It is not possible to say from our data that the complex mixture of  
709 chemokines, growth factors and other secreted factors are also contributing to  
710 suppressing keratinocyte differentiation. In our study the essential growth factors for  
711 keratinocyte proliferation were probably present in the culture medium and the Fib-  
712 Mat provided the ECM components to correctly present these growth factors to the  
713 growing keratinocytes. However, whether essential secreted factors were present in  
714 the Fib-Mat at very low concentration is unclear as the proteomics methodology may  
715 not detect such proteins.

716

717 In conclusion, this study highlights the important role of a native ECM in modulating  
718 keratinocyte growth and differentiation. Our novel culture system using dermal  
719 fibroblast ECM is superior to current protocols for the serum-free culture of  
720 keratinocytes for clinical use because it delivers undifferentiated keratinocytes that  
721 continue to proliferate. In contrast, keratinocytes expanded using type I collagen (the  
722 current protocol) are likely to have progressed down the terminal differentiation  
723 pathway as a result of the expansion protocol used.

724 **Acknowledgements**

725 The authors are grateful to Dr. Paula Benny for her technical assistance and Mr. John  
726 Lim for assisting in image analysis. The authors would also like to thank A/Prof.  
727 Pritinder Kaur for her guidance in the colony formation assay and Prof. John  
728 Whitelock and Dr Megan Lord for their gift of the anti-perlecan antibody, CCN-1.  
729 Chee Wai Wong was supported by a Curtin University Strategic International  
730 Research Scholarship. Radoslaw M Sobota was funded by IMCB, A\*STAR, Young  
731 Investigator Grant YIG 2015 (BMRC, A\*STAR) and NMRC MS-CETSA platform  
732 grant MOHIAFCAT2/004/2015. The authors acknowledge the provision of research  
733 facilities and technical assistance of the staff of CHIRI Bioscience, which was partly  
734 funded by Curtin University, State and Commonwealth Governments.

735

736 **Author Contribution**

737 Chee-Wai Wong: Conception and design, collection and assembly of data, data analysis  
738 and interpretation, manuscript writing, final approval of manuscript.  
739 Beverley F. Kinnear: Conception and design, final approval of manuscript.  
740 Radoslaw M. Sobota: Conception and design, collection and assembly of data, final  
741 approval of manuscript.  
742 Rajkumar Ramalingam: Conception and design, collection and assembly of data, final  
743 approval of manuscript.  
744 Catherine F. Legrand: Collection and assembly of data, final approval of manuscript.  
745 Danielle E. Dye: Conception and design, final approval of manuscript.  
746 Michael Raghunath: Conception and design, final approval of manuscript.  
747 E. Birgitte Lane: Conception and design, supply of research materials, financial  
748 support, final approval of manuscript.

749 Deirdre R. Coombe: Conception and design, data interpretation, financial support,

750 manuscript writing, final approval of manuscript.

751

752

753

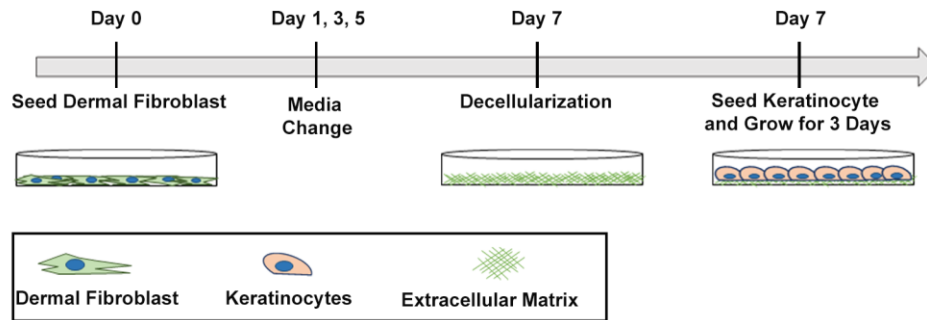

754

755 **Figure 1: Schematic of the preparation of a xenogeneic-free acellular dermal**  
756 **fibroblast-derived matrix as a substrate for keratinocytes.**

757

758

759

760

761

762

763

764

765

766



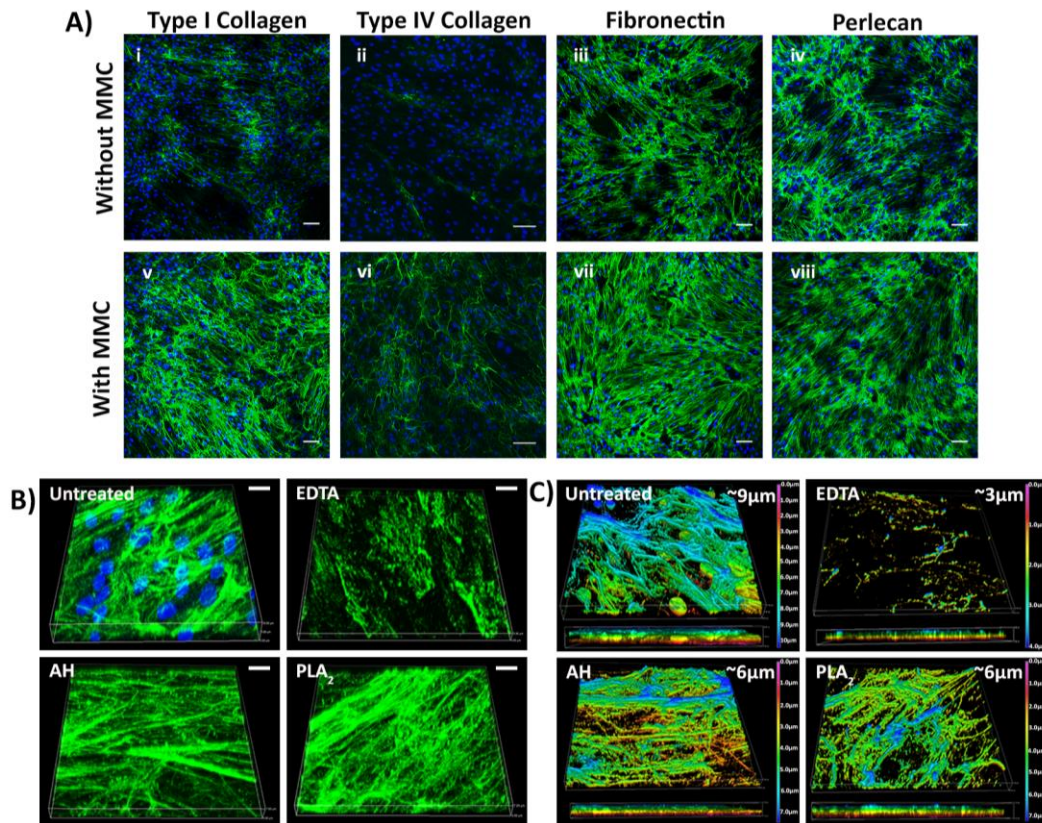

767

768 **Figure 2: ECM proteins deposited by dermal fibroblasts**

769 **A)** The effect of MMC on HDF ECM deposition. The cells and matrix were  
770 immunostained for type I collagen (i, v), type IV collagen (ii, vi), fibronectin (iii, vii)  
771 and perlecan (iv, viii). Scale bars are 100 μm.

772 **B)** The 3D architecture of the ECM deposited by HDF before and after decellularisation  
773 with EDTA, AH or PLA<sub>2</sub> as revealed by type I collagen immunostaining and DAPI  
774 staining. Scale bars are 10 μm.

775 **C)** The thickness of the ECM after decellularisation. The colour coding represents the  
776 Z-depth location within the 3D z-stacked image.

777

778

779

## Core Matrisome Proteins

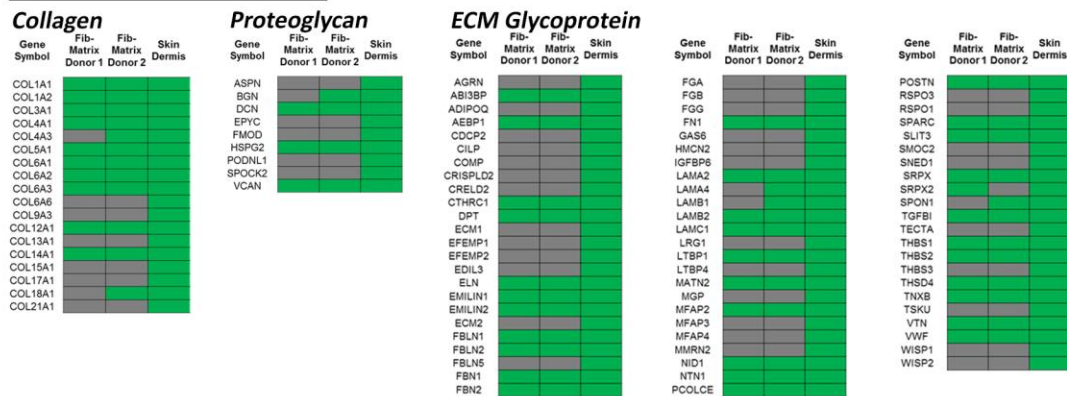

## Matrisome Associated Proteins

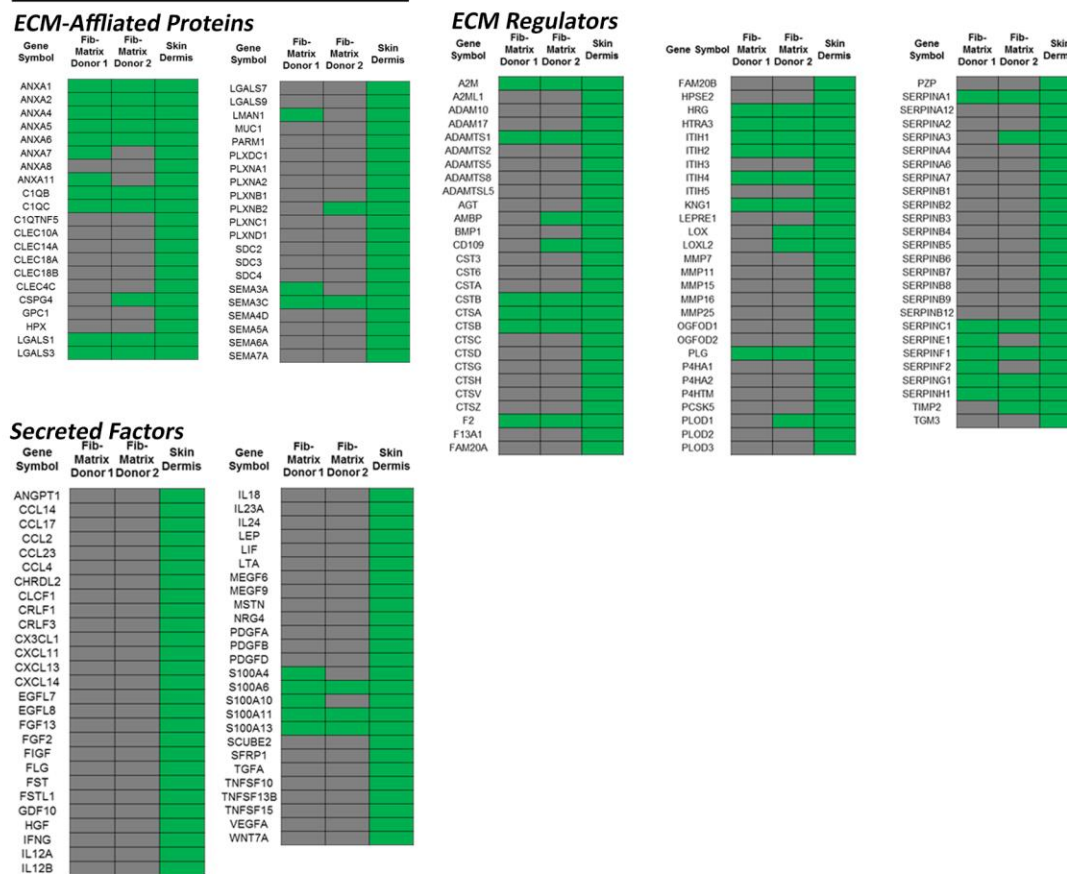

780

781 **Figure 3: Protein composition of the acellular ECM.** Protein compositions of the  
 782 acellular ECM from dermal fibroblasts from two donors were compared to that of the  
 783 dermis. The ECM proteins are subdivided into two categories; “core matrisome” (ECM  
 784 glycoproteins, collagens and proteoglycans); and “matrisome-associated proteins”  
 785 (ECM-affiliated proteins, ECM regulators and secreted factors). Green and grey  
 786 indicate the presence or absence of ECM proteins respectively.

787

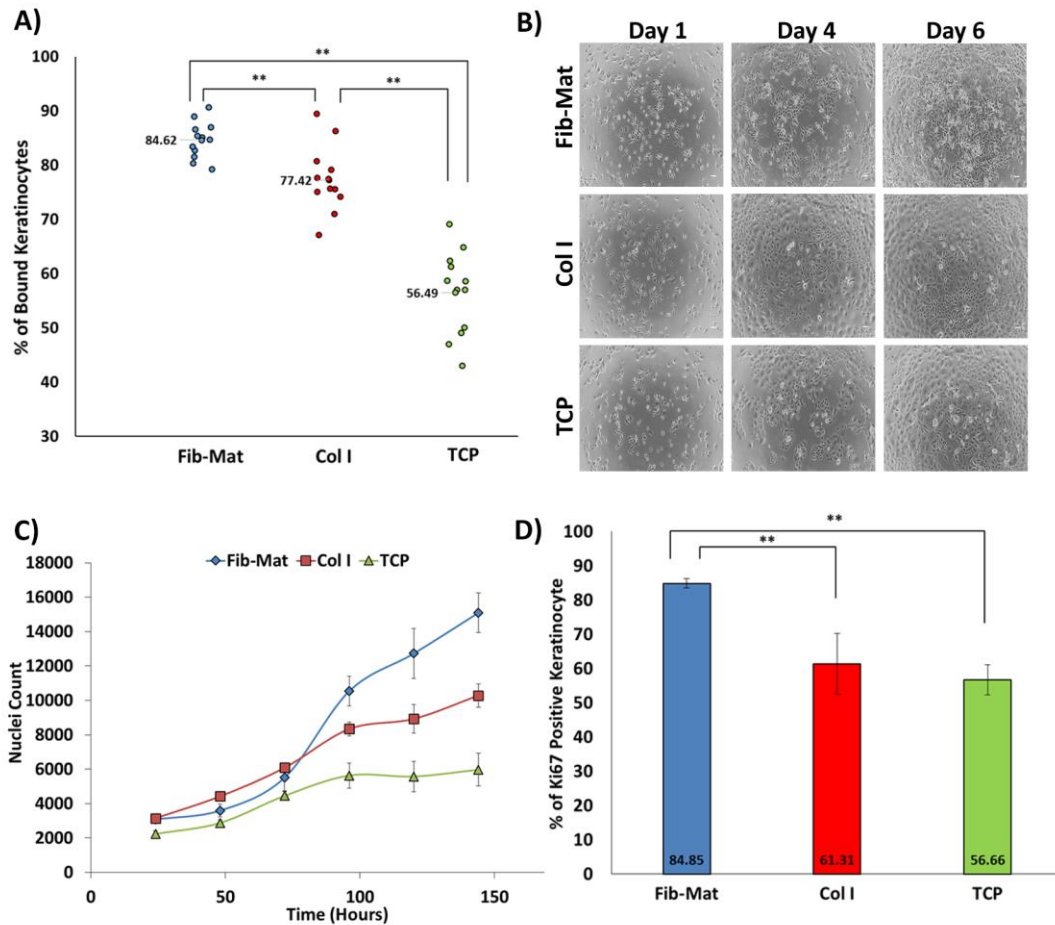

788

789 **Figure 4: The different substrates support keratinocyte adhesion and**  
 790 **proliferation to varying degrees.**

791 **A)** The ability of Fib-Mat, Col I and TCP to support keratinocyte adhesion. The data  
 792 are the mean percent of bound keratinocytes  $\pm$  standard deviation; mean values are  
 793 given. Shown are pooled data from three separate experiments. \*\*=  $P < 0.01$

794 **B)** Morphology of keratinocytes growing on dermal fibroblast-derived matrix (Fib-  
 795 Mat), type I collagen (Col I) and tissue culture plastic (TCP) as captured by phase  
 796 contrast microscopy. Keratinocyte on days 1, 4 and 6 post seeding are shown. Scale  
 797 bars are 100 μm.

798 **C)** The ability of Fib-Mat, Col I and TCP to support keratinocyte proliferation. Nuclei  
 799 were stained with DAPI and counted. The data are the mean  $\pm$  standard deviation  
 800 obtained from 4 replicate wells. A representative of three separate experiments is  
 801 shown.

802 **D)** Ki67 expression by keratinocytes cultured on Fib-Mat, Col I and TCP. The data  
 803 are the mean percent of Ki67 positive keratinocytes  $\pm$  standard deviation; mean values



804 are given. The data shown are representative of three separate experiments. \*\* =  
805 P<0.01.

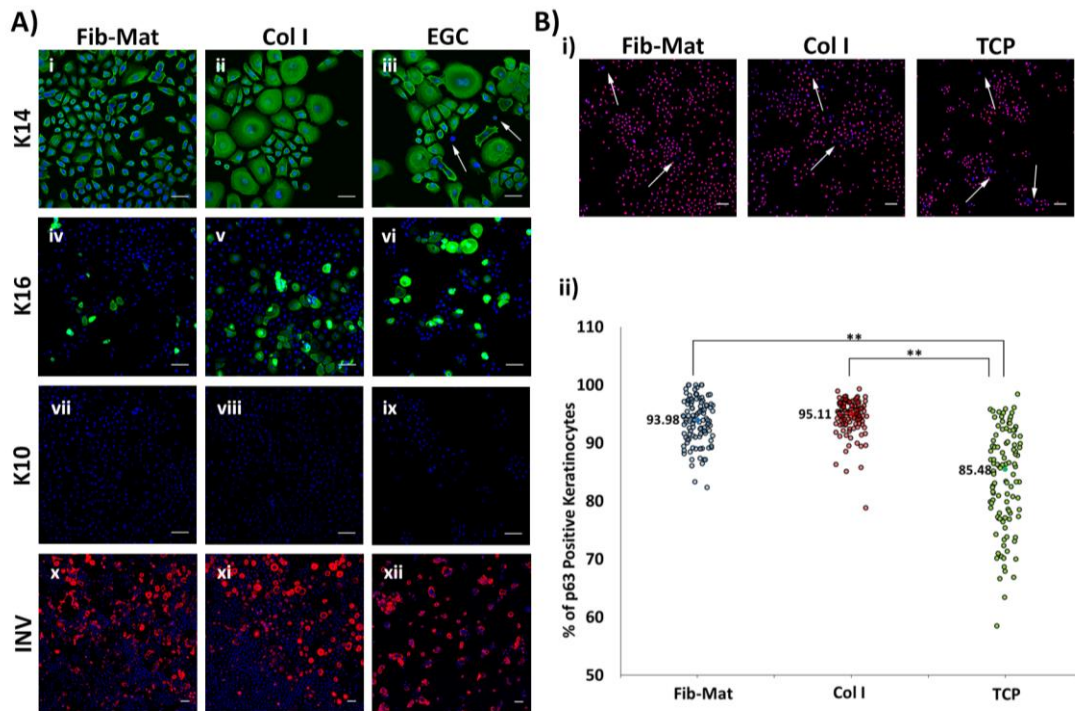

806  
807 **Figure 5: Expression of differentiation markers by keratinocytes grown on**  
808 **different substrates.**

809 **A)** The expression of K14 (i-iii), K16 (iv-vi), K10 (vii-ix) and involucrin (x-xii) by  
810 keratinocytes grown for three days on Fib-Mat, Col I and etched glass coverslips  
811 (EGC). Nuclei were stained using DAPI (Blue). Scale bars are 50  $\mu\text{m}$  for K14 and 100  
812  $\mu\text{m}$  for K10, K16 and involucrin. Arrows indicate keratinocytes with no K14  
813 expression.

814 **B)** Expression of p63 by keratinocytes grown on Fib-Mat, Col I and TCP. i)  
815 Representative image of keratinocytes immunostained for p63. Arrows indicate the area  
816 of p63 negative keratinocytes. The nuclei were stained using DAPI (Blue) Scale bars  
817 are 100  $\mu\text{m}$ . ii) Quantification of keratinocytes positive for p63. The data shown are  
818 representative of three separate experiments. Median values are given. Statistical  
819 analyses were a Kruskal-Wallis test followed by a Mann-Whitney test. \*\* = P<0.01

820  
821  
822  
823  
824

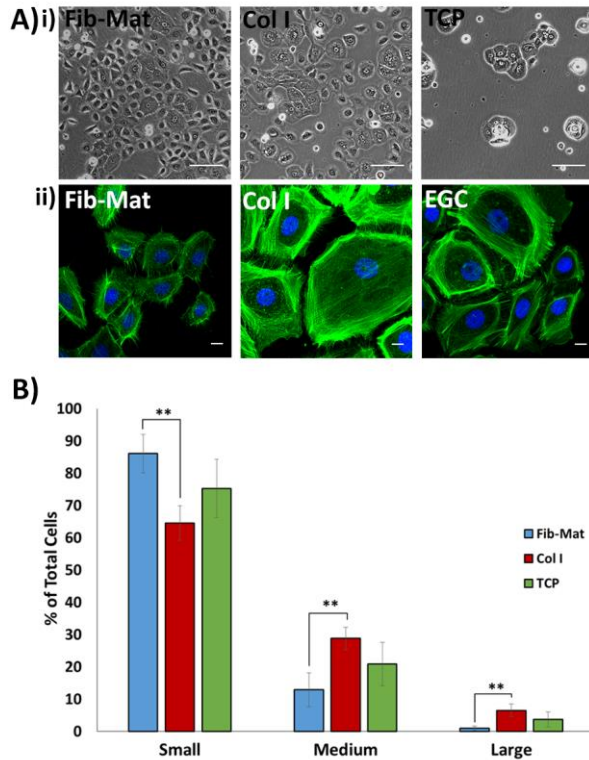

825

826 **Figure 6: Size of keratinocytes grown on different substrates.**

827 A) i) Phase contrast images show differences in the size of keratinocytes grown on the  
828 various substrates. Images were captured on day 3 of culture. Scale bars are 100  $\mu\text{m}$ .

829 ii) Representative images of keratinocytes stained with phalloidin-Alexa Fluor<sup>®</sup> 488  
830 demonstrating that phalloidin staining accurately revealed keratinocyte size. Scale bars  
831 are 50  $\mu\text{m}$ . Nuclei were stained using DAPI (Blue).

832 B) Frequency of keratinocytes of differing size. Cell size was categorised as small,  
833 medium or large based on cell area (small < medium < large =  
834 < 2000  $\mu\text{m}^2$  < 4000  $\mu\text{m}^2$  < 6000  $\mu\text{m}^2$ ). The data shown are the mean percent of total cells  $\pm$   
835 standard deviation. Pooled data from three separate experiments are shown. \* =  $P \leq 0.05$ .

836

837

838

839

840

841

842

843

844

845

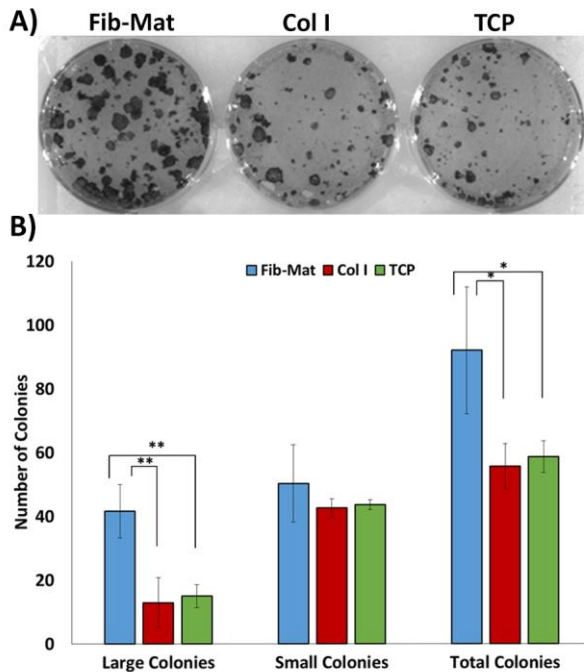

846

847 **Figure 7: Colony forming ability of keratinocytes previously cultured on different**  
848 **substrates.**

849 A) Representative image of the colonies formed by keratinocytes previously cultured  
850 on different substrates. Keratinocytes were cultured for three days on Fib-Mat, type I  
851 collagen or uncoated TCP, the cells were harvested and single cells were seeded at low  
852 density onto mitomycin treated 3T3-J2 feeder cells. After 12 days keratinocyte colonies  
853 were stained with toluidine blue and imaged.

854 B) Quantification of the colonies. All colonies were counted and categorized: large  
855 colonies were  $\geq 1\text{mm}^2$ , and small colonies were cell clusters  $<1\text{mm}^2$ . The data shown  
856 are representative of three separate experiments. \* =  $P \leq 0.05$  and \*\* =  $P < 0.01$

857

858

859

860

861

862

863

864

865

866

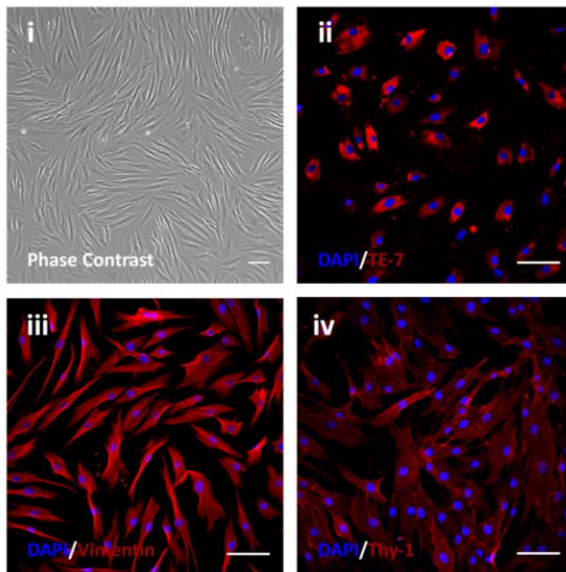

867

868 **Figure S1: Characterization of human dermal fibroblasts (HDF).**

869 HDF were stained with antibodies recognising the fibroblast markers: TE-7 (ii),  
870 vimentin (iii) or Thy-1 (iv). The secondary antibody was an Alexa Fluor® 546-  
871 conjugated anti-mouse IgG1. Nuclei were stained with DAPI (blue). Scale bars are 100  
872  $\mu\text{m}$ .

873

874

875

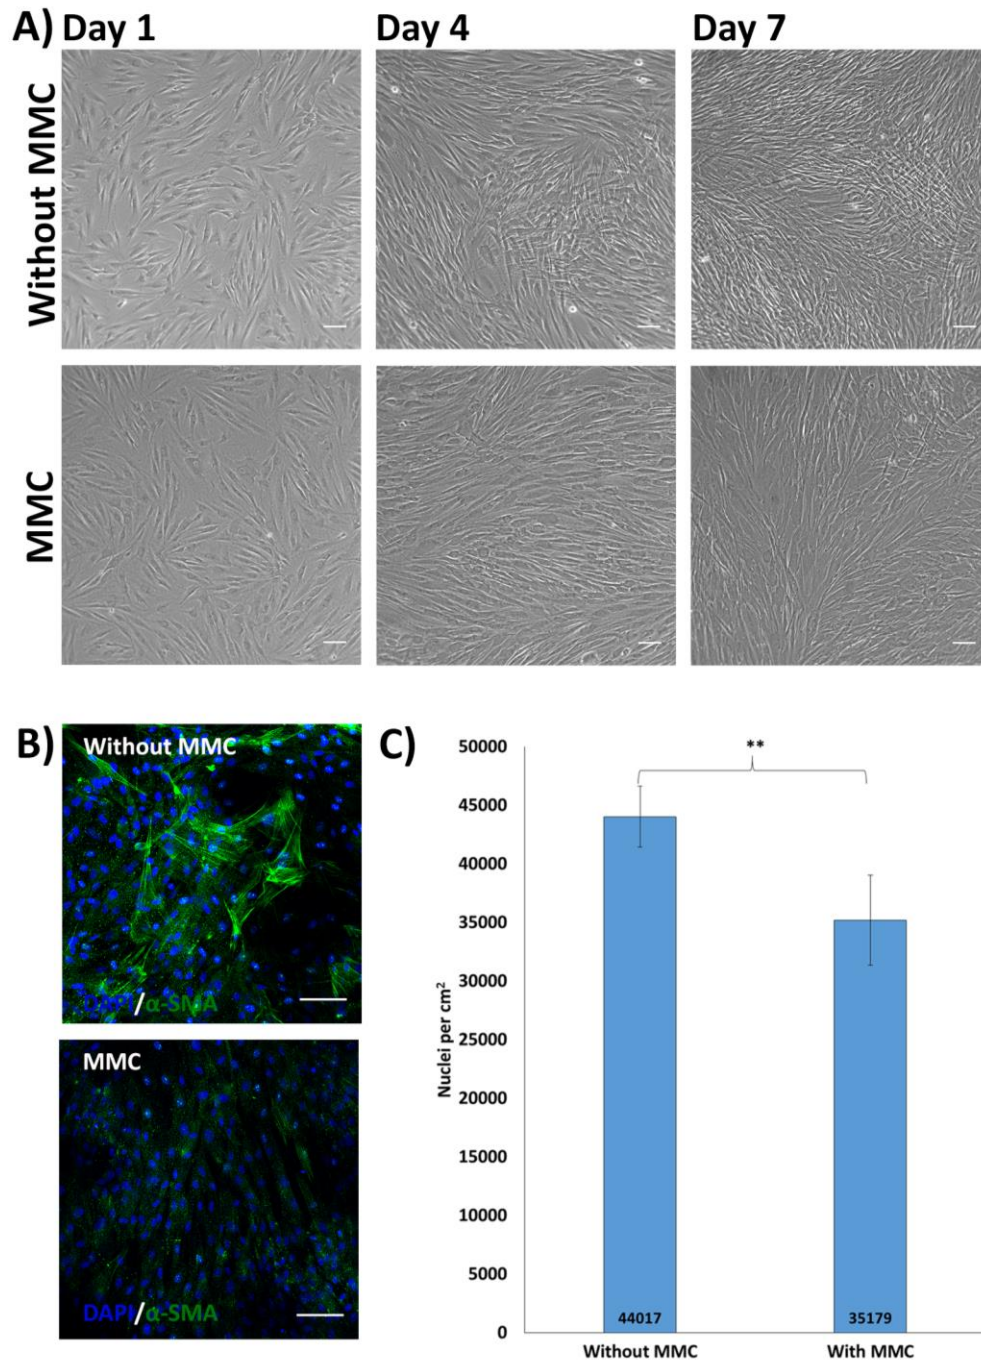

876

877 **Figure S2: The effect of MMC on fibroblast behaviour.**

878 A) Phase contrast images of HDF cultured with or without MMC. Scale bars are 100  
879  $\mu$ m.

880 B) Myofibroblast differentiation with and without MMC. HDF were grown either with  
881 or without MMC for seven days. The cells were stained with a mAb recognising  $\alpha$ -  
882 smooth muscle actin ( $\alpha$ -SMA) and imaged by confocal microscopy. The secondary  
883 antibody was an Alexa Fluor® 488-conjugated anti-mouse IgG2a. Nuclei were stained  
884 using DAPI (Blue). Scale bars are 100  $\mu$ m.



885 C) HDF grow more slowly under MMC conditions. The number of HDFs after  
886 culturing with or without MMC for seven days. Data are expressed as mean  $\pm$  SD. Mean  
887 values are given. Shown is a representative of triplicate experiments. \*\* =  $P < 0.01$ .

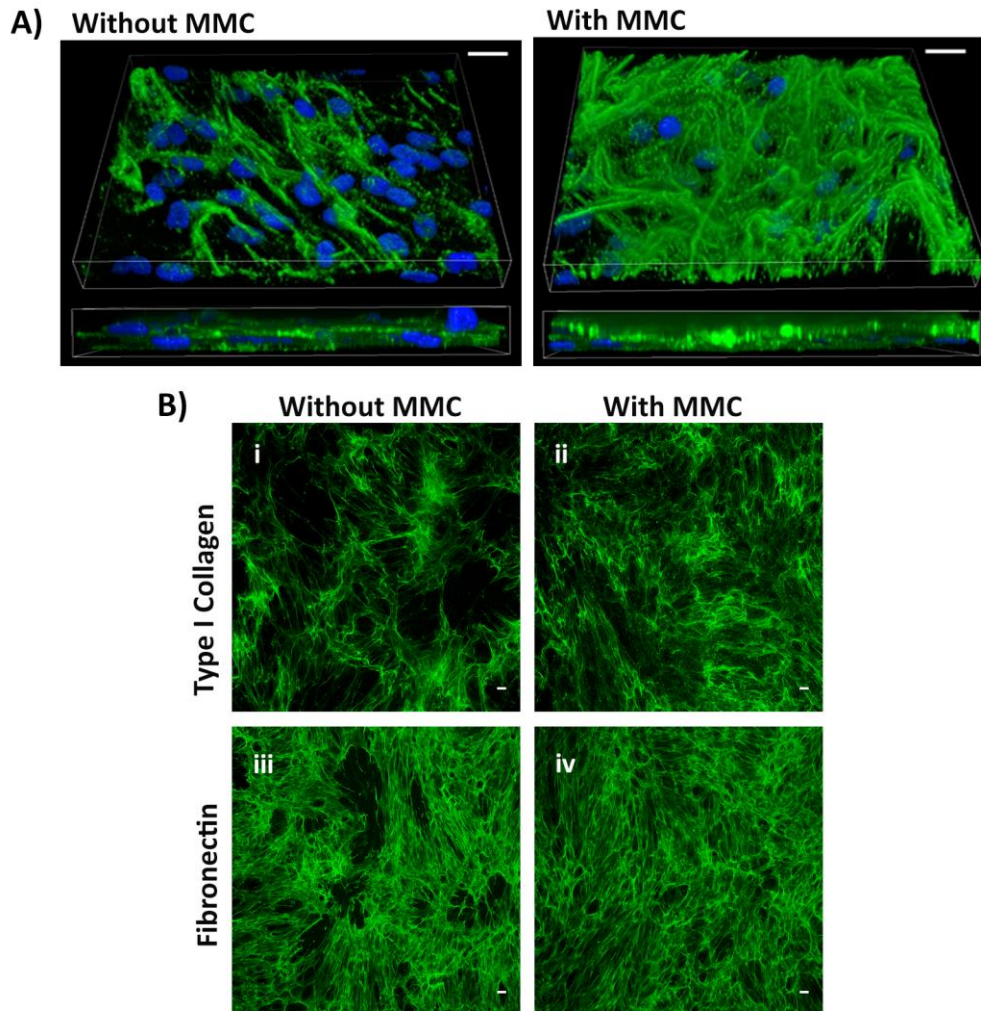

888

889 **Figure S3: The effect of MMC on the ECM deposited by HDF**

890 **A)** The effect of MMC on the 3D architecture of the ECM deposited by HDF. A 3D Z-  
891 stacked confocal image of type I collagen deposited by HDFs grown without or with  
892 MMC for seven days. Cells and matrix were immunostained for type I collagen. The  
893 secondary antibody was an anti-rabbit IgG Alexa Fluor® 488-conjugated antibody.  
894 Nuclei were stained with DAPI (Blue). Scale bars are 10  $\mu$ m.

895 **B)** The ECM deposited by HDF with or without MMC after decellularisation. The HDF  
896 were grown with or without MMC for seven days. The cell layers were decellularised  
897 using PLA<sub>2</sub>. Matrices were immunostained for type I collagen (i, ii) or fibronectin (iii,  
898 iv). The secondary antibody was an Alexa Fluor® 488-conjugated anti-rabbit IgG.  
899 Nuclei were stained with DAPI (Blue). Scale bars are 100  $\mu$ m.

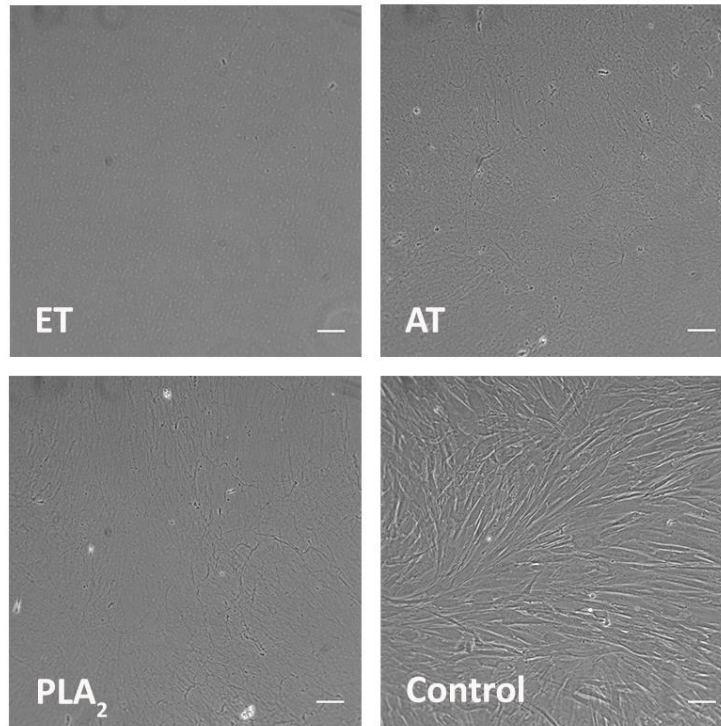

900

901 **Figure S4: Decellularised dermal fibroblast-derived ECM prepared using EDTA,**  
902 **ammonia hydroxide (AH) or phospholipase A<sub>2</sub> (PLA<sub>2</sub>).** Images were obtained using  
903 phase contrast microscopy. The HDF were grown with MMC for seven days and  
904 decellularised as indicated. The control was HDF before decellularisation. Scale bars  
905 are 100  $\mu\text{m}$ .

906

907

908

909

910

911

912

913

914

915

916

917

918

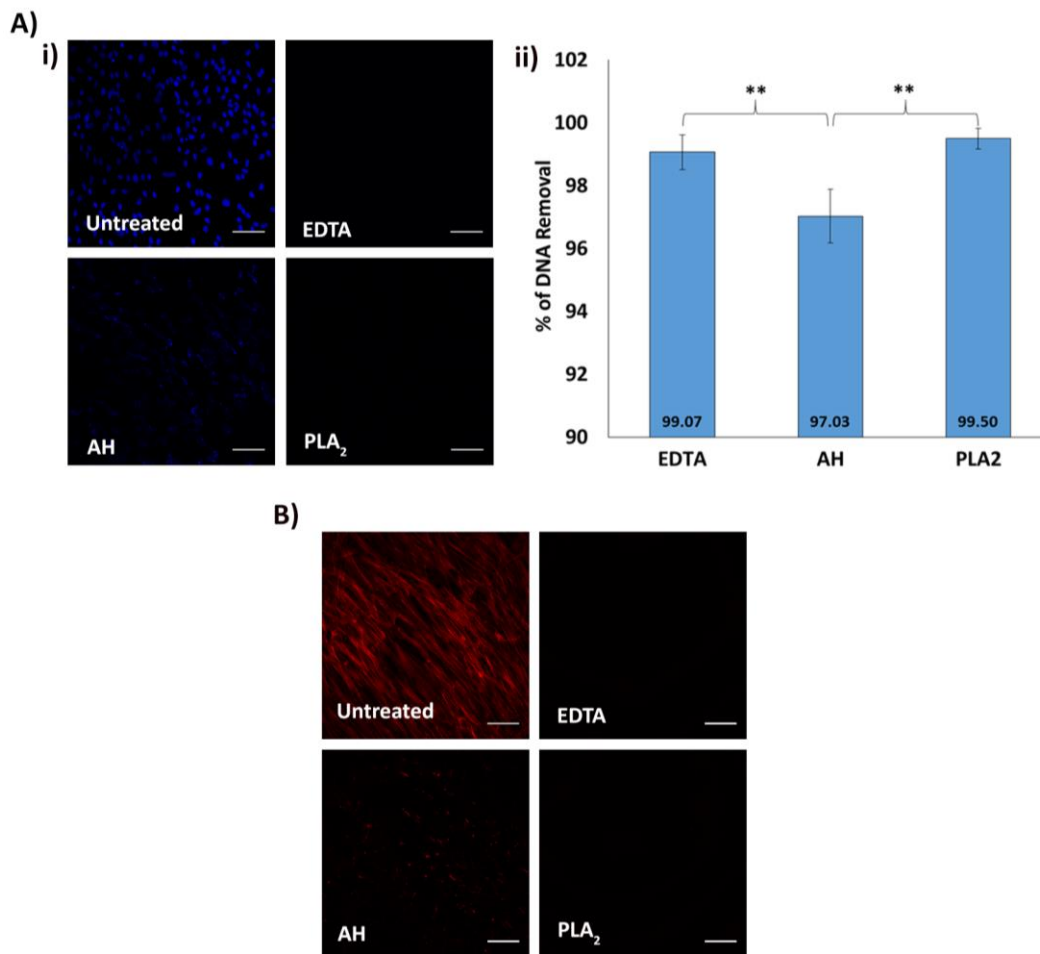

919

920 **Figure S5: Efficacy of methods for decellularisation of HDF matrices.**

921 **A)** Efficacy of decellularisation methods for removing nuclear components. i) DAPI  
922 staining of the variously decellularised ECM and untreated HDF control. HDF were  
923 grown with MMC for seven days then decellularised by the method indicated. Images  
924 were obtained using fluorescence microscopy. Scale bars are 100  $\mu$ m. ii) Quantification  
925 of DNA removed after decellularisation. The CyQuant dye was used to measure the  
926 DNA present following decellularisation and these fluorescent intensity values were  
927 subtracted from the fluorescent intensity of the untreated control to allow calculation  
928 of percent of DNA removed. Means  $\pm$  SD of 4 replicates are shown. The figure is a  
929 representative of three experiments. \*\* =  $P < 0.01$ .

930 **B)** Efficacy of different decellularisation treatments for removing cytoskeletal  
931 components. Phalloidin staining of the variously decellularised ECM and untreated  
932 HDF control cell layer for polymerised actin. Images were obtained using fluorescence  
933 microscopy. Scale bars are 100  $\mu$ m.

934

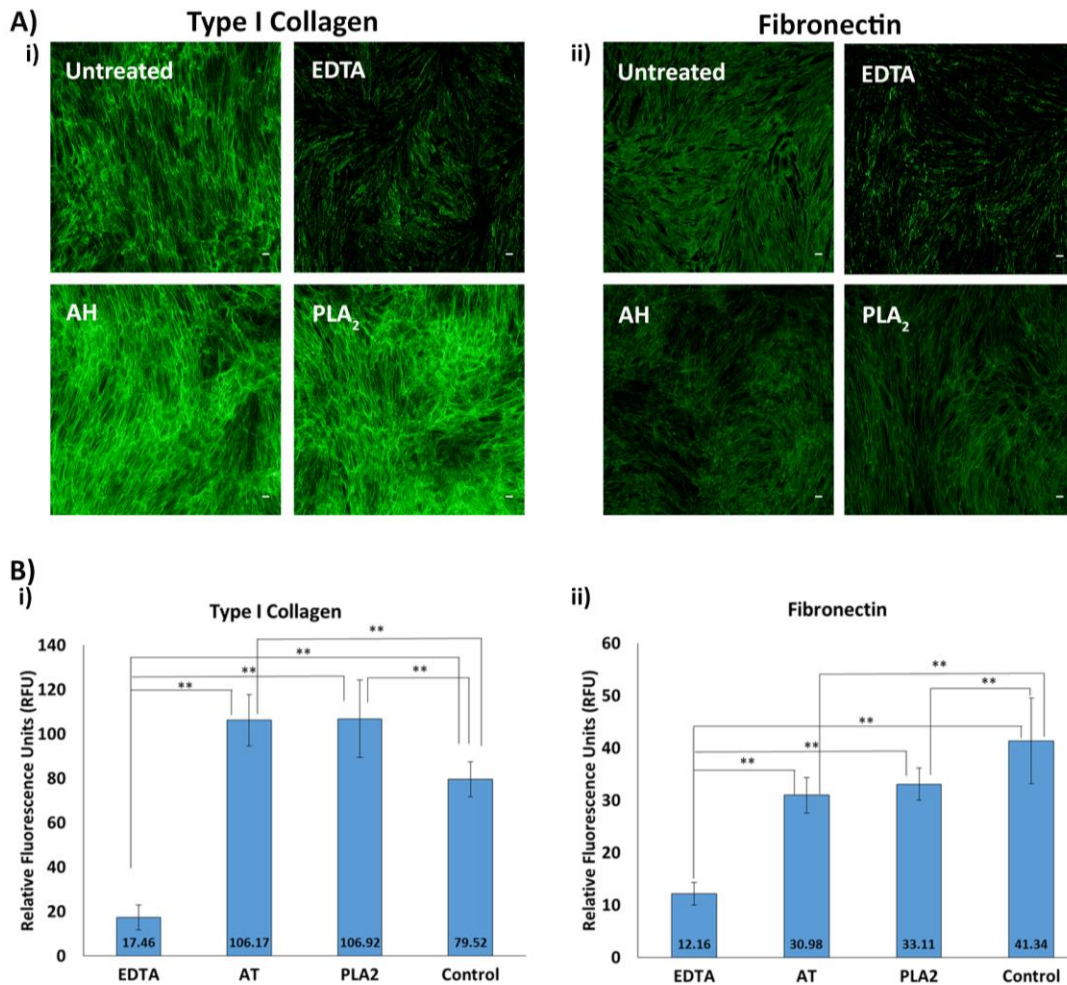

935

936

**Figure S6: Quantities of the deposited ECM after decellularisation.**

937

**A)** Representative images of ECM obtained using different decellularisation treatments: EDTA, ammonia hydroxide (AH) & phospholipase A<sub>2</sub> (PLA<sub>2</sub>). The acellular ECM were immunostained using antibodies recognizing either type I collagen or fibronectin. Scale bars are 100  $\mu$ m.

941

**B)** Quantification of fluorescence intensity of type I collagen (i) and fibronectin (ii) immunostaining after decellularisation. Data are expressed as mean  $\pm$  SD. Mean value are shown. The figure is representative of three experiments. \*= $P < 0.05$

944

945

946

947

948

949

950



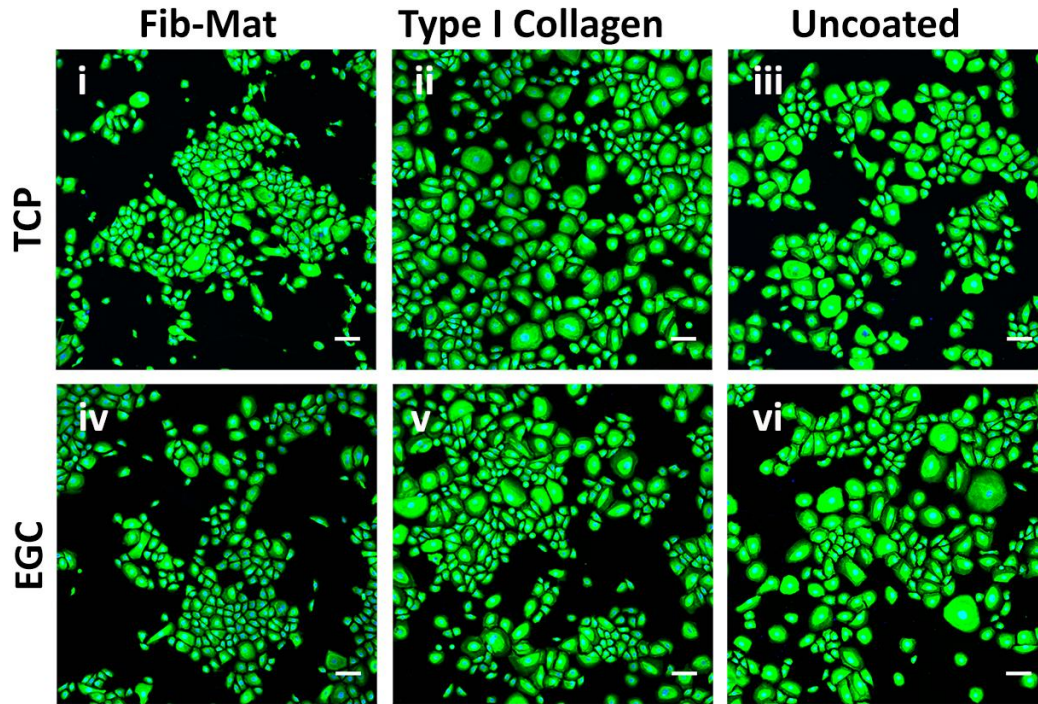

951

952 **Figure S7: Comparison of tissue culture plastic (TCP) and etched glass coverslips**  
953 **(EGC) as a platform for keratinocyte growth.**

954 Keratinocytes grown on either EGC or TCP coated with either Fib-Mat (i,iv), type I  
955 collagen (3ug/cm<sup>2</sup>: ii,iv) or were uncoated (plain: iii, vi). Keratinocytes were cultured  
956 for 3 days in DKSFM then fixed with acetone: methanol (1:1) and immunostained for  
957 K14. The secondary antibody was an anti-mouse IgG Alexa Fluor® 488-conjugated  
958 antibody (Green). Nuclei were stained with DAPI (Blue). Scale bars are 100μm.

959

960

961

962

963

964

965

966

967

968

969

970

971

972 **Reference**

- 973 1. Fuchs E. Scratching the surface of skin development. **NATURE**  
974 2007;445(7130):834–842.
- 975 2. Chen M, Przyborowski M, Berthiaume F. Stem cells for skin tissue engineering and  
976 wound healing. **CRIT REV BIOMED ENG** 2009;37(4-5):399–421.
- 977 3. Priya SG, Jungvid H, Kumar A. Skin Tissue Engineering for Tissue Repair and  
978 Regeneration. **TISSUE ENGINEERING PART B: REVIEWS**  
979 2008;14(1):105–118.
- 980 4. Rheinwald JG, Green H. Serial cultivation of strains of human epidermal  
981 keratinocytes: the formation keratinizin colonies from single cells. **CELL**  
982 1975;6(3):331–343.
- 983 5. MacNeil S. Progress and opportunities for tissue-engineered skin. **NATURE**  
984 2007;445(7130):874–880.
- 985 6. Coolen NA, Verkerk M, Reijnen L, et al. Culture of keratinocytes for  
986 transplantation without the need of feeder layer cells. **CELL TRANSPLANT**  
987 2007;16(6):649–661.
- 988 7. Esteban-Vives R, Young M, Over P, et al. In vitro keratinocyte expansion for cell  
989 transplantation therapy is associated with differentiation and loss of basal layer  
990 derived progenitor population. **DIFFERENTIATION** 2015:1–9.
- 991 8. Barrandon Y, Grasset N, Zaffalon A, et al. Capturing epidermal stemness for  
992 regenerative medicine. **SEMINARS IN CELL AND DEVELOPMENTAL**  
993 **BIOLOGY** 2012;23(8):937–944.
- 994 9. Peehl DM, Ham RG. Growth and differentiation of human keratinocytes without a  
995 feeder layer or conditioned medium. **IN VITRO** 1980;16(6):516–525.
- 996 10. Boyce ST, Ham RG. Calcium-regulated differentiation of normal human  
997 epidermal keratinocytes in chemically defined clonal culture and serum-free serial  
998 culture. **J INVESTIG DERMATOL** 1983.
- 999 11. Hubmacher D, Apte SS. The biology of the extracellular matrix. **CURRENT**  
1000 **OPINION IN RHEUMATOLOGY** 2013;25(1):65–70.
- 1001 12. Frantz C, Stewart KM, Weaver VM. The extracellular matrix at a glance.  
1002 2010;123(Pt 24):4195–4200.
- 1003 13. Peng Y, Bocker MT, Holm J, et al. Human fibroblast matrices bio-assembled  
1004 under macromolecular crowding support stable propagation of human embryonic  
1005 stem cells. **J TISSUE ENG REGEN MED** 2012;6(10):e74–e86.
- 1006 14. Jiang D, Xu B, Yang M, et al. Efficacy of tendon stem cells in fibroblast-derived  
1007 matrix for tendon tissue engineering. **JOURNAL OF CYTOTHERAPY**  
1008 2014;16(5):662–673.

- 1009 15. Ng CP, Sharif ARM, Heath DE, et al. Enhanced ex vivo expansion of adult  
1010 mesenchymal stem cells by fetal mesenchymal stem cell ECM.  
1011 **BIOMATERIALS** 2014;35(13):4046–4057.
- 1012 16. Zhou Y, Zimmer M, Yuan H, et al. Effects of Human Fibroblast-Derived  
1013 Extracellular Matrix on Mesenchymal Stem Cells. **STEM CELL REV** 2016:1–  
1014 13.
- 1015 17. Chen C, Loe F, Blocki A, et al. Applying macromolecular crowding to enhance  
1016 extracellular matrix deposition and its remodeling in vitro for tissue engineering  
1017 and cell-based therapies. **ADVANCED DRUG DELIVERY REVIEWS**  
1018 2011;63(4-5):277–290.
- 1019 18. Kumar P, Satyam A, Fan X, et al. Macromolecularly crowded in vitro  
1020 microenvironments accelerate the production of extracellular matrix-rich  
1021 supramolecular assemblies. **SCI. REP.** 2015;5:8729–10.
- 1022 19. Minton AP. The Influence of Macromolecular Crowding and Macromolecular  
1023 Confinement on Biochemical Reactions in Physiological Media. **JOURNAL OF**  
1024 **BIOLOGICAL CHEMISTRY** 2001;276(14):10577–10580.
- 1025 20. Zeiger AS, Loe FC, Li R, et al. Macromolecular Crowding Directs Extracellular  
1026 Matrix Organization and Mesenchymal Stem Cell Behavior. Tsilibary EC, ed.  
1027 **PLOS ONE** 2012;7(5):e37904.
- 1028 21. Chaturvedi V, Dye DE, Kinnear BF, et al. Interactions between Skeletal Muscle  
1029 Myoblasts and their Extracellular Matrix Revealed by a Serum Free Culture  
1030 System. Engler AJ, ed. **PLOS ONE** 2015;10(6):e0127675–27.
- 1031 22. Naba A, Clauser KR, Hoersch S, et al. The matrisome: in silico definition and in  
1032 vivo characterization by proteomics of normal and tumor extracellular matrices.  
1033 **MOL. CELL PROTEOMICS** 2012;11(4):M111.014647–M111.014647.
- 1034 23. Uhlén M, Fagerberg L, Hallström BM, et al. Proteomics. Tissue-based map of the  
1035 human proteome. **SCIENCE** 2015;347(6220):1260419–1260419.
- 1036 24. Bliss E, Heywood WE, Benatti M, et al. An optimised method for the proteomic  
1037 profiling of full thickness human skin. **BIOLOGICAL PROCEDURES**  
1038 **ONLINE** 2016:1–7.
- 1039 25. Haase I, Evans R, Pofahl R, et al. Regulation of keratinocyte shape, migration and  
1040 wound epithelialization by IGF-1-and EGF-dependent signalling pathways. 2003.
- 1041 26. Gregory GG, O'Connor NE, Compton CC. *Permanent coverage of large burn*  
1042 *wounds with autologous cultured human epithelium.* N Engl J Med; 1984.
- 1043 27. Dunnwald M, Tomanek-Chalkley A, Alexandrunas D, et al. Isolating a pure  
1044 population of epidermal stem cells for use in tissue engineering.  
1045 **EXPERIMENTAL DERMATOLOGY** 2001;10(1):45–54.
- 1046 28. Li A, Pouliot N, Redvers R, et al. Extensive tissue-regenerative capacity of  
1047 neonatal human keratinocyte stem cells and their progeny. **J. CLIN. INVEST.**

- 1048 2004;113(3):390–400.
- 1049 29. Kim DS, Cho HJ, Choi HR, et al. Isolation of human epidermal stem cells by  
1050 adherence and the reconstruction of skin equivalents. **CELL. MOL. LIFE SCI.**  
1051 2004;61(21):2774–2781.
- 1052 30. Cerqueira MT, Frias AM, Reis RL, et al. Boosting and Rescuing Epidermal  
1053 Superior Population from Fresh Keratinocyte Cultures. **STEM CELLS AND**  
1054 **DEVELOPMENT** 2014;23(1):34–43.
- 1055 31. Horch RE, Debus M, Wagner G, et al. Cultured human keratinocytes on type I  
1056 collagen membranes to reconstitute the epidermis. **TISSUE ENG.** 2000;6(1):53–  
1057 67.
- 1058 32. Youn SW, Kim DS, Cho HJ, et al. Cellular senescence induced loss of stem cell  
1059 proportion in the skin in vitro. **JOURNAL OF DERMATOLOGICAL**  
1060 **SCIENCE** 2004;35(2):113–123.
- 1061 33. Strudwick XL, Lang DL, Smith LE, et al. Combination of Low Calcium with Y-  
1062 27632 Rock Inhibitor Increases the Proliferative Capacity, Expansion Potential  
1063 and Lifespan of Primary Human Keratinocytes while Retaining Their Capacity to  
1064 Differentiate into Stratified Epidermis in a 3D Skin Model. Brandner JM, ed.  
1065 **PLOS ONE** 2015;10(4):e0123651–12.
- 1066 34. Lu H, Hoshiba T, Kawazoe N, et al. Cultured cell-derived extracellular matrix  
1067 scaffolds for tissue engineering. **BIOMATERIALS** 2011;32(36):9658–9666.
- 1068 35. Fitzpatrick LE, McDevitt TC. Cell-derived matrices for tissue engineering and  
1069 regenerative medicine applications. **BIOMATER SCI** 2015;3(1):12–24.
- 1070 36. Xing Q, Yates K, Tahtinen M, et al. Decellularization of Fibroblast Cell Sheets for  
1071 Natural Extracellular Matrix Scaffold Preparation. **TISSUE ENGINEERING**  
1072 **PART C: METHODS** 2015;21(1):77–87.
- 1073 37. Zhang W, Zhu Y, Li J, et al. Cell-Derived Extracellular Matrix: Basic  
1074 Characteristics and Current Applications in Orthopedic Tissue Engineering.  
1075 **TISSUE ENGINEERING PART B: REVIEWS** 2016;22(3):193–207.
- 1076 38. Sorrell JM, Caplan AI. Fibroblast heterogeneity: more than skin deep.  
1077 2004;117(Pt 5):667–675.
- 1078 39. Sriram G, Bigliardi PL, Bigliardi-Qi M. Fibroblast heterogeneity and its  
1079 implications for engineering organotypic skin models in vitro. **EUROPEAN**  
1080 **JOURNAL OF CELL BIOLOGY** 2015;94(11):483–512.
- 1081 40. Lai Y, Sun Y, Skinner CM, et al. Reconstitution of marrow-derived extracellular  
1082 matrix ex vivo: a robust culture system for expanding large-scale highly  
1083 functional human mesenchymal stem cells. **STEM CELLS AND**  
1084 **DEVELOPMENT** 2010;19(7):1095–1107.
- 1085 41. Lin H, Yang G, Tan J, et al. Influence of decellularized matrix derived from  
1086 human mesenchymal stem cells on their proliferation, migration and multi-



- 1087 lineage differentiation potential. **BIOMATERIALS** 2012;33(18):4480–4489.
- 1088 42. Rakian R, Block TJ, Johnson SM, et al. Native extracellular matrix preserves  
1089 mesenchymal stem cell “stemness” and differentiation potential under serum-free  
1090 culture conditions. **STEM CELL RES THER** 2015:1–11.
- 1091 43. He F, Chen X, Pei M. Reconstruction of an in vitro tissue-specific  
1092 microenvironment to rejuvenate synovium-derived stem cells for cartilage tissue  
1093 engineering. **TISSUE ENG PART A** 2009;15(12):3809–3821.
- 1094 44. Pei M, Zhang Y, Li J, et al. Antioxidation of Decellularized Stem Cell Matrix  
1095 Promotes Human Synovium-Derived Stem Cell-Based Chondrogenesis. **STEM**  
1096 **CELLS AND DEVELOPMENT** 2013;22(6):889–900.
- 1097 45. Fuchs E, Green H. Changes in keratin gene expression during terminal  
1098 differentiation of the keratinocyte. **CELL** 1980;19(4):1033–1042.
- 1099 46. Coulombe PA, Kopan R, Fuchs E. Expression of keratin K14 in the epidermis and  
1100 hair follicle: insights into complex programs of differentiation. **J. CELL BIOL.**  
1101 1989;109(5):2295–2312.
- 1102 47. Troy TC, Turksen K. In vitro characteristics of early epidermal progenitors  
1103 isolated from keratin 14 (K14)-deficient mice: insights into the role of keratin 17  
1104 in mouse keratinocytes. **J. CELL. PHYSIOL.** 1999;180(3):409–421.
- 1105 48. Alam H, Sehgal L, Kundu ST, et al. Novel function of keratins 5 and 14 in  
1106 proliferation and differentiation of stratified epithelial cells. **MOL. BIOL. CELL**  
1107 2011;22(21):4068–4078.
- 1108 49. Gawronska-Kozak B, Grabowska A, Kur-Piotrowska A, et al. Foxn1  
1109 Transcription Factor Regulates Wound Healing of Skin through Promoting  
1110 Epithelial-Mesenchymal Transition. Slominski AT, ed. **PLOS ONE**  
1111 2016;11(3):e0150635–21.
- 1112 50. Maruthappu T, Fell B, Delaney PJ, et al. Rhomboid family member 2 regulates  
1113 cytoskeletal stress-associated Keratin 16. **NATURE COMMUNICATIONS**  
1114 2017;8:1–11.
- 1115 51. Mills AA, Zheng B, Wang XJ, et al. p63 is a p53 homologue required for limb  
1116 and epidermal morphogenesis. **NATURE** 1999;398(6729):708–713.
- 1117 52. Yang A, Schweitzer R, Sun D, et al. p63 is essential for regenerative proliferation  
1118 in limb, craniofacial and epithelial development. **NATURE** 1999;398(6729):714–  
1119 718.
- 1120 53. Parsa R, Yang A, McKeon F, et al. Association of p63 with Proliferative Potential  
1121 in Normal and Neoplastic Human Keratinocytes. **J. INVEST. DERMATOL.**  
1122 1999;113(6):1099–1105.
- 1123 54. Izumi K, Tobita T, Feinberg SE. Isolation of human oral keratinocyte  
1124 progenitor/stem cells. **JOURNAL OF DENTAL RESEARCH** 2007;86(4):341–  
1125 346.

- 1126 55. Li J, Miao C, Guo W, et al. Enrichment of putative human epidermal stem cells  
1127 based on cell size and collagen type IV adhesiveness. **CELL RES**  
1128 2008;18(3):360–371.
- 1129 56. Sun TT, Green H. Differentiation of the epidermal keratinocyte in cell culture:  
1130 formation of the cornified envelope. **CELL** 1976;9(4 Pt 1):511–521.
- 1131 57. Watt FM, Green H. Involucrin synthesis is correlated with cell size in human  
1132 epidermal cultures. **J. CELL BIOL.** 1981.
- 1133 58. Barrandon Y, Green H. Cell size as a determinant of the clone-forming ability of  
1134 human keratinocytes. **PROC. NATL. ACAD. SCI. U.S.A.** 1985;82(16):5390–  
1135 5394.
- 1136 59. Nanba D, Toki F, Tate S, et al. Cell motion predicts human epidermal stemness. **J.**  
1137 **CELL BIOL.** 2015;209(2):305–315.
- 1138 60. Nanba D, Toki F, Matsushita N, et al. Actin filament dynamics impacts  
1139 keratinocyte stem cell maintenance. **EMBO MOL MED** 2013;5(4):640–653.
- 1140 61. Webb A, Li A, Kaur P. Location and phenotype of human adult keratinocyte stem  
1141 cells of the skin. **DIFFERENTIATION** 2004;72(8):387–395.
- 1142 62. Barrandon Y, Green H. Three clonal types of keratinocyte with different  
1143 capacities for multiplication. **PROC. NATL. ACAD. SCI. U.S.A.**  
1144 1987;84(8):2302–2306.
- 1145 63. Adams JC, Watt FM. Fibronectin inhibits the terminal differentiation of human  
1146 keratinocytes. **NATURE** 1989;340(6231):307–309.
- 1147 64. Watt FM, Kubler MD, Hotchin NA, et al. Regulation of keratinocyte terminal  
1148 differentiation by integrin-extracellular matrix interactions. 1993;106(1):175–182.
- 1149 65. Flaim CJ, Chien S, Bhatia SN. An extracellular matrix microarray for probing  
1150 cellular differentiation. **NAT METH** 2005;2(2):119–125.
- 1151 66. Flaim CJ, Teng D, Chien S, et al. Combinatorial Signaling Microenvironments for  
1152 Studying Stem Cell Fate. **STEM CELLS AND DEVELOPMENT**  
1153 2008;17(1):29–40.
- 1154 67. Malta DFB, Reticker-Flynn NE, da Silva CL, et al. Extracellular matrix  
1155 microarrays to study inductive signaling for endoderm specification. **ACTA**  
1156 **BIOMATERIALIA** 2016;34(C):30–40.
- 1157
